# Supplementary material for: Ultrasensitive Detection of Circulating LINE-1 ORF1p as a Specific Multicancer Biomarker
Source: PubMed Central journal article supplement — Cancer Discov. 2023 Sep 12;13(12):2532–47. doi: 10.1158/2159-8290.CD-23-0313 (PMC10773488; doi:10.1158/2159-8290.cd-23-0313), 2023-09-12
Supplement: cd-23-0313_supplementary_figure_1_suppsf1.pdf [file cd-23-0313_supplementary_figure_1_suppsf1.pdf]

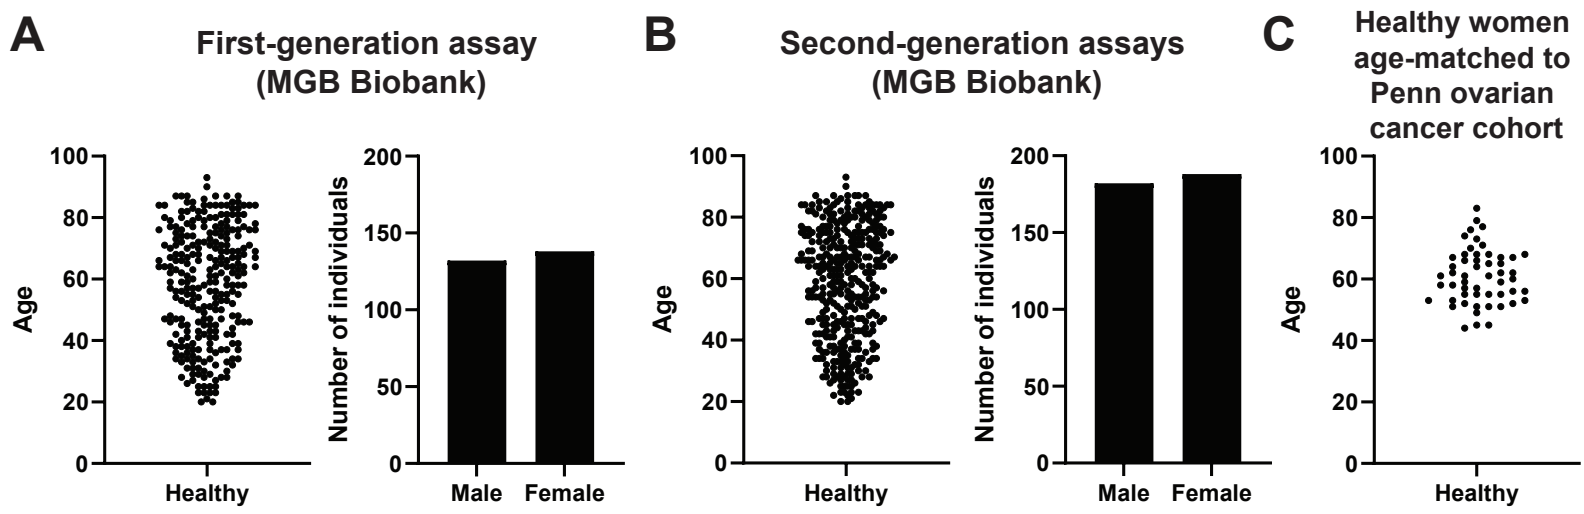

**Supplementary Figure 1. Age and gender distributions of healthy control patients** studied in the first- and second-generation ORF1p Simoa assays. from the (A-B) Mass General Brigham Biobank in the first-generation (A) and second-generation (B) ORF1p Simoa assays; and (C) Penn Medicine Biobank. Healthy female control patients from the Penn Medicine Biobank were age-matched with the ovarian cancer patients from the Penn Ovarian Cancer Research Center Tumor BioTrust Collection.
