# Supplementary material for: Ultrasensitive Detection of Circulating LINE-1 ORF1p as a Specific Multicancer Biomarker
Source: PubMed Central journal article supplement — Cancer Discov. 2023 Sep 12;13(12):2532–47. doi: 10.1158/2159-8290.CD-23-0313 (PMC10773488; doi:10.1158/2159-8290.cd-23-0313), 2023-09-12
Supplement: cd-23-0313_supplementary_figure_2_suppsf2.pdf [file cd-23-0313_supplementary_figure_2_suppsf2.pdf]

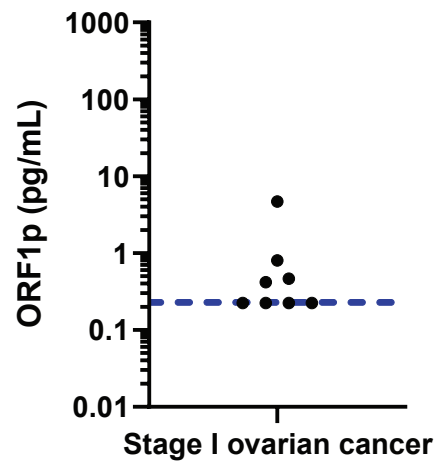

**Supplementary Figure 2. Circulating ORF1p levels in eight stage I ovarian cancer patients, as measured by the first-generation Simoa assay. Blue dashed line indicates the assay limit of detection, accounting for the four-fold dilution factor.**
