# Supplementary material for: Ultrasensitive Detection of Circulating LINE-1 ORF1p as a Specific Multicancer Biomarker
Source: PubMed Central journal article supplement — Cancer Discov. 2023 Sep 12;13(12):2532–47. doi: 10.1158/2159-8290.CD-23-0313 (PMC10773488; doi:10.1158/2159-8290.cd-23-0313), 2023-09-12
Supplement: cd-23-0313_supplementary_figure_3_suppsf3.pdf [file cd-23-0313_supplementary_figure_3_suppsf3.pdf]

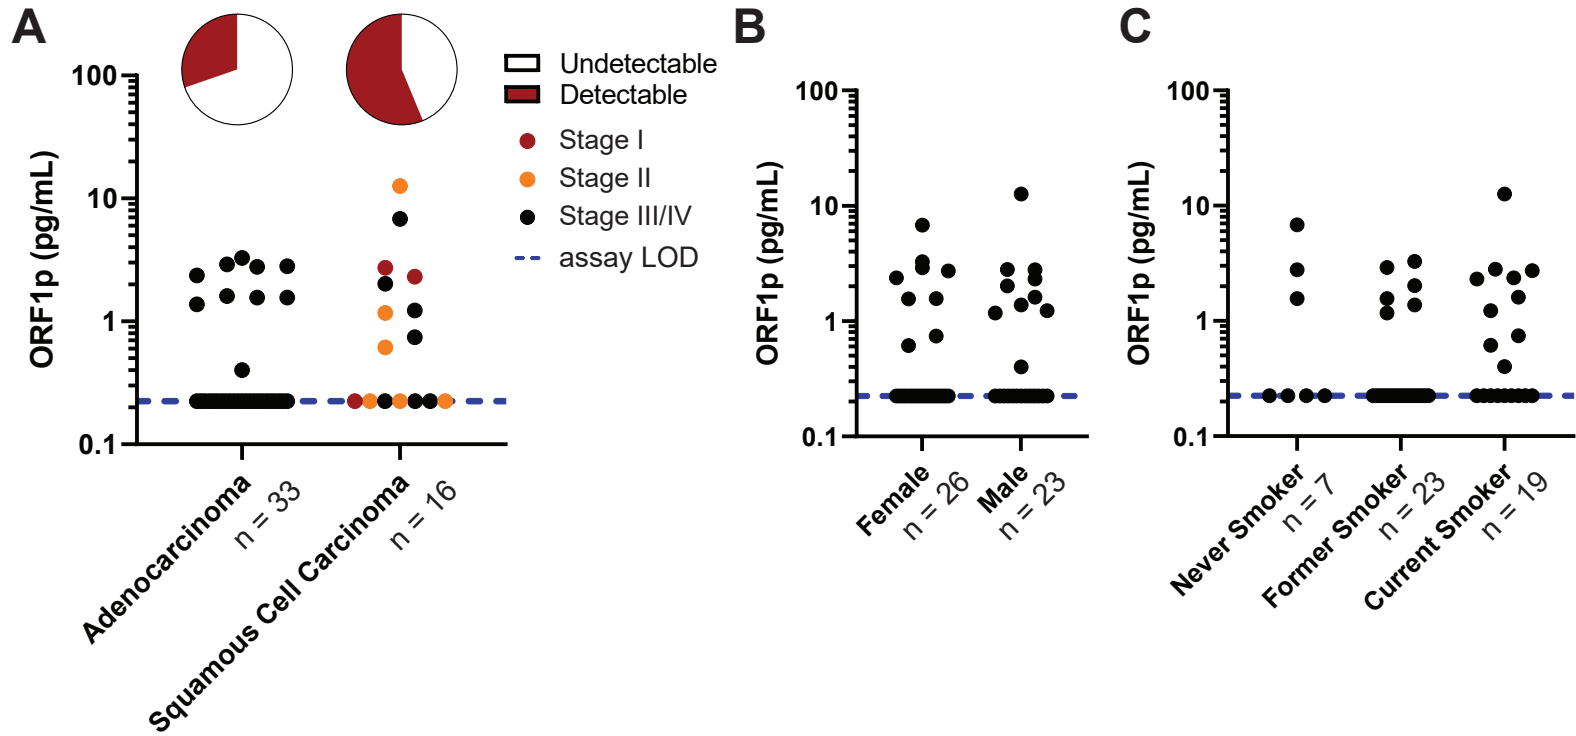

**Supplementary Figure 3. Circulating ORF1p levels in lung cancer patient cohort, as classified by (A) disease subtype, (B) gender, and (C) smoking status. Blue dashed line indicates the assay limit of detection, accounting for the four-fold dilution factor.**
