# Supplementary material for: Ultrasensitive Detection of Circulating LINE-1 ORF1p as a Specific Multicancer Biomarker
Source: PubMed Central journal article supplement — Cancer Discov. 2023 Sep 12;13(12):2532–47. doi: 10.1158/2159-8290.CD-23-0313 (PMC10773488; doi:10.1158/2159-8290.cd-23-0313), 2023-09-12
Supplement: cd-23-0313_supplementary_figure_5_suppsf5.pdf [file cd-23-0313_supplementary_figure_5_suppsf5.pdf]

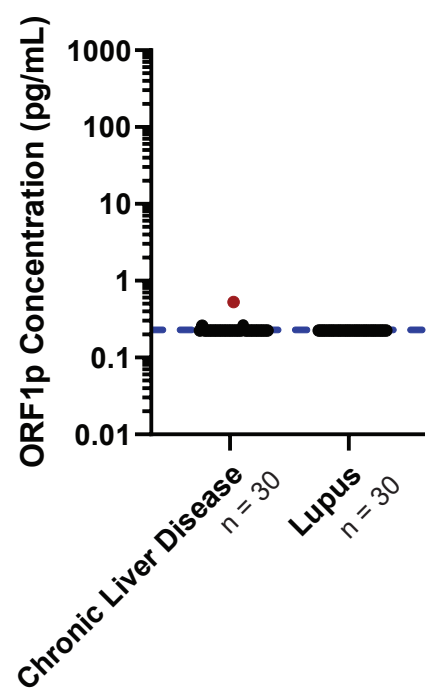

**Supplementary Figure 5. Circulating ORF1p levels in patients with chronic liver disease or systemic lupus erythematosus**, measured using the first-generation Simoa assay. The red dot represents a chronic liver disease patient diagnosed with hepatocellular carcinoma after the time of sampling. Blue dashed line denotes the assay limit of detection, accounting for four-fold dilution.
