# Supplementary material for: Ultrasensitive Detection of Circulating LINE-1 ORF1p as a Specific Multicancer Biomarker
Source: PubMed Central journal article supplement — Cancer Discov. 2023 Sep 12;13(12):2532–47. doi: 10.1158/2159-8290.CD-23-0313 (PMC10773488; doi:10.1158/2159-8290.cd-23-0313), 2023-09-12
Supplement: cd-23-0313_supplementary_figure_8_suppsf8.pdf [file cd-23-0313_supplementary_figure_8_suppsf8.pdf]

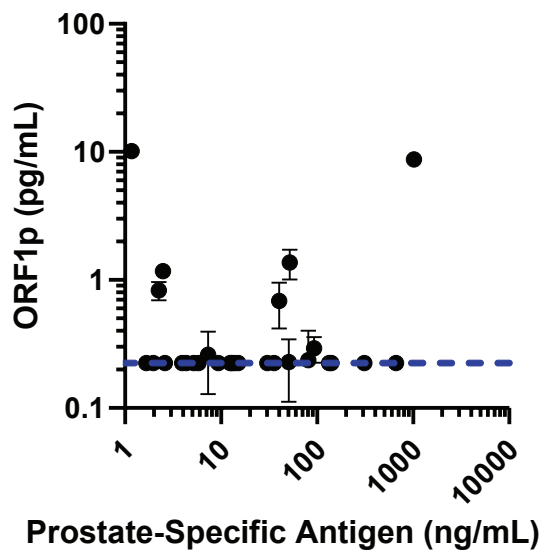

**Supplementary Figure 8. Circulating ORF1p (first generation Simoa assay) versus prostate-specific antigen (PSA) levels** in prostate cancer patient plasma. Blue dashed line indicates the Simoa assay limit of detection, accounting for four-fold dilution. PSA was measured in the Mass General Brigham Core Laboratory as part of routine clinical care using the Roche Elecsys total PSA assay on Cobas e602 instruments.
