# Supplementary material for: Ultrasensitive Detection of Circulating LINE-1 ORF1p as a Specific Multicancer Biomarker
Source: PubMed Central journal article supplement — Cancer Discov. 2023 Sep 12;13(12):2532–47. doi: 10.1158/2159-8290.CD-23-0313 (PMC10773488; doi:10.1158/2159-8290.cd-23-0313), 2023-09-12
Supplement: cd-23-0313_supplementary_figure_9_suppsf9.pdf [file cd-23-0313_supplementary_figure_9_suppsf9.pdf]

**A**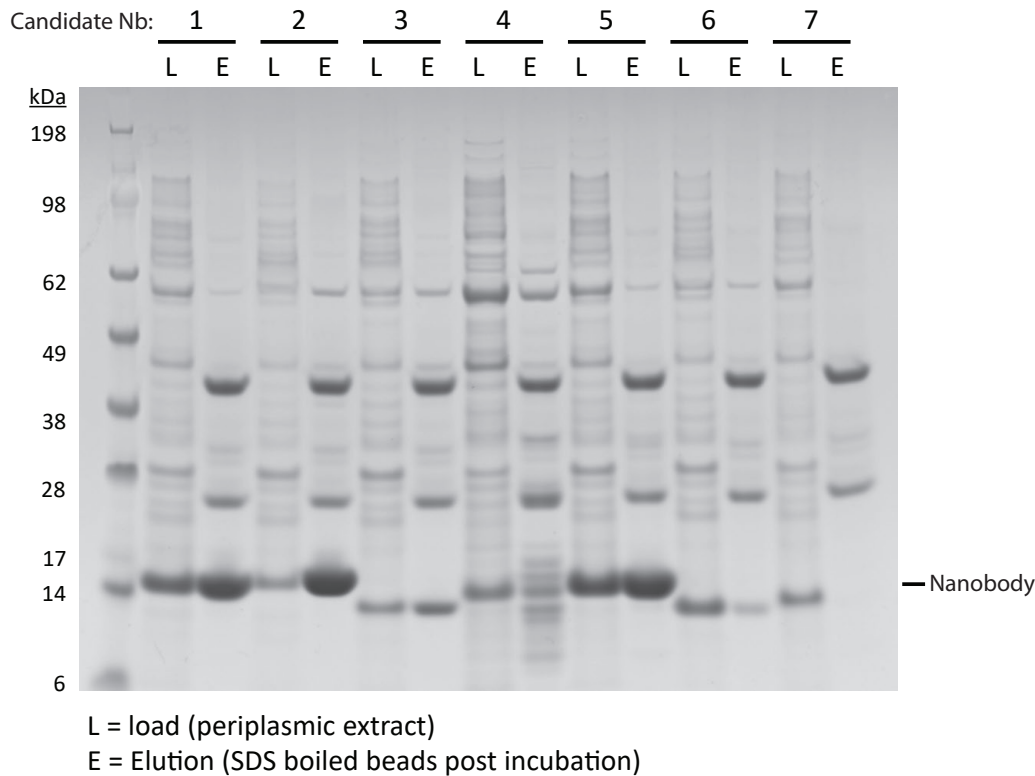**B**

|                   | ELISA<br>EC50 (nM) |
|-------------------|--------------------|
| <b>Nb ORF1-1</b>  | <b>19.4</b>        |
| <b>Nb ORF1-2</b>  | <b>4.8</b>         |
| Nb ORF1-3         | 3.0                |
| Nb ORF1-4         | 6.0                |
| <b>Nb ORF1-5</b>  | <b>1.8</b>         |
| Nb ORF1-6         | 11.4               |
| Nb ORF1-7         | NA                 |
| <b>Nb ORF1-8</b>  | <b>1.4</b>         |
| <b>Nb ORF1-9</b>  | <b>1.2</b>         |
| <b>Nb ORF1-10</b> | <b>1.2</b>         |
| <b>Nb ORF1-11</b> | <b>1.5</b>         |
| <b>Nb ORF1-12</b> | <b>1.4</b>         |
| <b>Nb ORF1-13</b> | <b>1.1</b>         |
| Nb ORF1-14        | NA                 |
| <b>Nb ORF1-15</b> | <b>0.6</b>         |
| <b>Nb ORF1-16</b> | <b>1.0</b>         |
| <b>Nb ORF1-17</b> | <b>1.0</b>         |
| Nb ORF1-18        | 5.6                |
| Nb ORF1-19        | 7.9                |
| <b>Nb ORF1-20</b> | <b>1.8</b>         |
| <b>Nb ORF1-21</b> | <b>0.6</b>         |

**Supplementary Figure 9. Nanobody generation.** (A) Representative screening results for nanobodies 1-7. Periplasmic extracts from *E. Coli* expressing the indicated candidate nanobodies (Nb) were bound to ORF1p-conjugated beads and eluted, then analyzed by SDS-PAGE and stained by Coomassie blue. Expressed and purified nanobodies (~15 kDa) are indicated; larger/darker bands indicate higher levels of expression and/or purification. (B) EC50s from ELISAs performed against recombinant ORF1p. Highlighted nanobodies were selected for follow-up characterization, while remainder were rejected for poor affinity and/or protein expression.
