# Supplementary material for: Ultrasensitive Detection of Circulating LINE-1 ORF1p as a Specific Multicancer Biomarker
Source: PubMed Central journal article supplement — Cancer Discov. 2023 Sep 12;13(12):2532–47. doi: 10.1158/2159-8290.CD-23-0313 (PMC10773488; doi:10.1158/2159-8290.cd-23-0313), 2023-09-12
Supplement: cd-23-0313_supplementary_figure_11_suppsf11.pdf [file cd-23-0313_supplementary_figure_11_suppsf11.pdf]

**A****Nanobody Constructs****Construct**    **Description**

MT991    Nb 1-1

MT992    Nb 2-2

MT993    Nb 5-5

MT994    Nb 5-1

MT995    Nb 5-2

MT996    Nb 5-5-5

MT997    Nb 5-5 long "LL"

MT1032    Nb 5-5-cys (short)

MT1033    5-5-cys (long1)

MT1034    2-2-cys (long2)

MT1035    5-5-cys(long2)

MT1036    2-9-cys(long2)

MT1037    5-9-cys(long2)

MT1038    9-9-cys(long2)

MT1039    5-2-9-cys

MT1040    5-9-2-cys

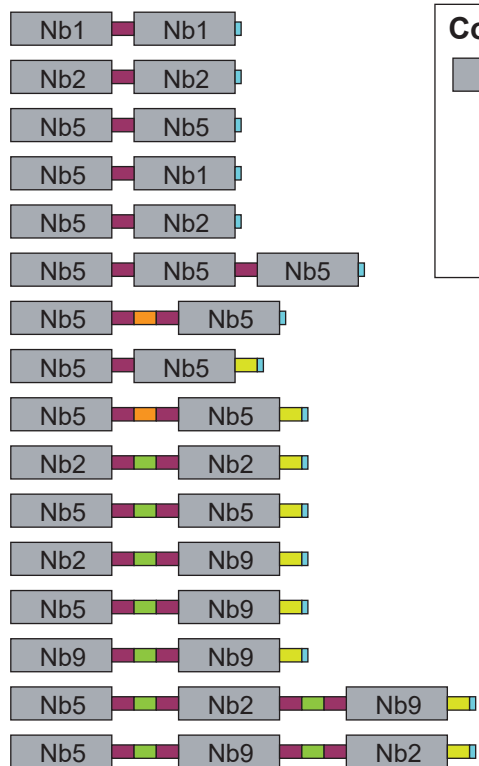**Components**

- Nb X    Camelid Nanobody
- (GGGGS)<sub>4</sub> linker
- His6 Tag
- (EAAAK)<sub>3</sub> linker
- (DAAAR)<sub>3</sub> linker
- 5xCys Tag

**B**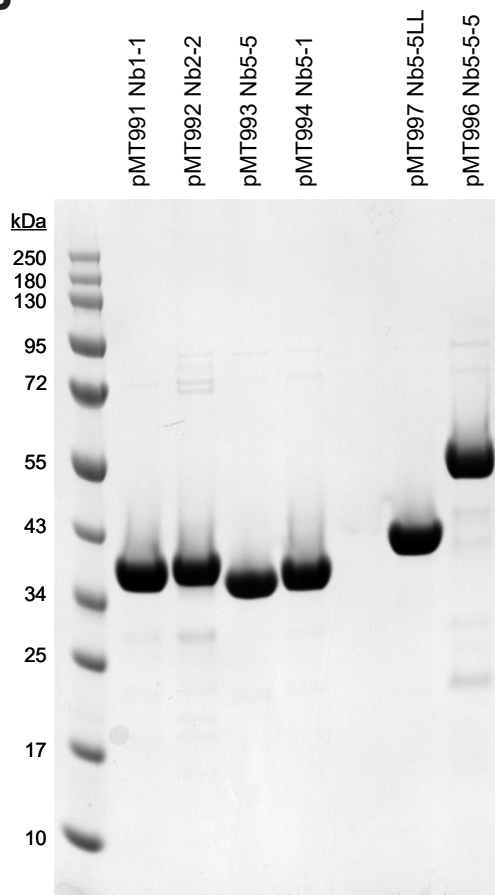

**Supplementary Figure 11. Engineered Nanobody constructs.** (A) Schematic of design of engineered dimeric and trimeric nanobody constructs, with flexible (GGGGS × 4) and rigid helical (EAAAK × 3 or DAAAR × 3) linker. 5xCys tag sequence is CGSGRCGSGRCGSGRCGSGRC. (B), Representative preparation of engineered nanobody constructs, Coomassie stain.
