# Supplementary material for: Ultrasensitive Detection of Circulating LINE-1 ORF1p as a Specific Multicancer Biomarker
Source: PubMed Central journal article supplement — Cancer Discov. 2023 Sep 12;13(12):2532–47. doi: 10.1158/2159-8290.CD-23-0313 (PMC10773488; doi:10.1158/2159-8290.cd-23-0313), 2023-09-12
Supplement: cd-23-0313_supplementary_figure_12_suppsf12.pdf [file cd-23-0313_supplementary_figure_12_suppsf12.pdf]

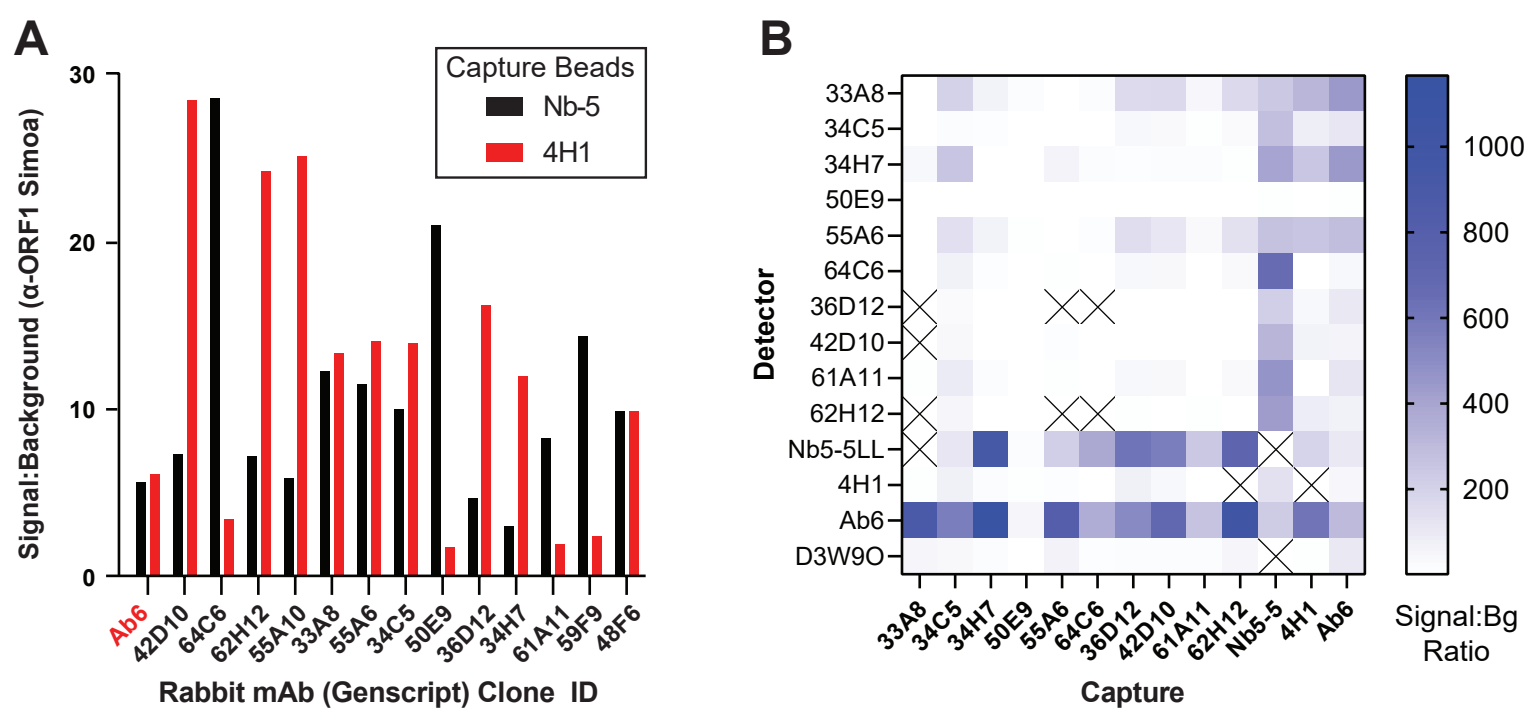

**C**

|         |       | DETECTOR |         |       |       |       |       |       |       |       |
|---------|-------|----------|---------|-------|-------|-------|-------|-------|-------|-------|
|         |       | Ab6      | Nb5-5LL | 33A8  | 34C5  | 34H7  | 64C6  | 61A11 | 62H12 | 55A6  |
| CAPTURE | 33A8  | 0.016    |         |       |       |       |       |       |       |       |
|         | 34C5  | 0.026    |         |       |       | 0.032 |       |       |       |       |
|         | 34H7  | 0.006    | 0.043   |       |       |       |       |       |       |       |
|         | 55A6  | 0.026    | 0.055   |       |       |       |       |       |       |       |
|         | 64C6  | 0.034    | 0.041   |       |       |       |       |       |       |       |
|         | 36D12 | 0.046    | 0.050   |       |       |       |       |       |       |       |
|         | 42D10 | 0.021    | 0.020   |       |       |       |       |       |       |       |
|         | 61A11 | 0.042    | 0.066   |       |       |       |       |       |       |       |
|         | 62H12 | 0.008    | 0.062   |       |       |       |       |       |       |       |
|         | Nb5-5 | 0.050    |         | 0.133 | 0.022 | 0.047 | 0.038 | 0.042 | 0.120 |       |
|         | 4H1   | 0.030    | 0.056   | 0.057 |       | 0.044 |       |       |       | 0.036 |
|         | Ab6   | 0.102    | 0.044   | 0.063 |       |       |       |       | 0.113 |       |

**Limit of Detection (pg/mL)**

**Supplementary Figure 12. Screening of newly developed monoclonal antibody candidates (GenScript).** (A) Signal:background ratios of novel rabbit monoclonal  $\alpha$ -ORF1p antibodies (B-cell supernatants) in a modified Simoa employing the candidate mAb plus biotinylated secondary anti-Rabbit pAb as detector; these show up to 5-fold improvement vs. our prior best detection antibody, Ab6. Two different capture beads with distinct epitopes were employed. (B-C) Best performers were then synthesized and purified; mAbs were used in further screening with a dimeric nanobody and commercially available monoclonal antibodies for ORF1p detection with Simoa. (B) Signal-to-background comparisons of affinity reagents as capture/detector pairs on Simoa, using recombinant ORF1p protein. All labeled affinity reagents except Nb5-5LL are monoclonal antibodies; Nb5-5LL denotes a homodimeric form of the nanobody Nb5. (C) Limit of detection values for affinity reagent pairs selected from screening in (B). Anti-ORF1 D3W9O is from Cell Signaling Technology.
