# Supplementary material for: Ultrasensitive Detection of Circulating LINE-1 ORF1p as a Specific Multicancer Biomarker
Source: PubMed Central journal article supplement — Cancer Discov. 2023 Sep 12;13(12):2532–47. doi: 10.1158/2159-8290.CD-23-0313 (PMC10773488; doi:10.1158/2159-8290.cd-23-0313), 2023-09-12
Supplement: cd-23-0313_supplementary_figure_13_suppsf13.pdf [file cd-23-0313_supplementary_figure_13_suppsf13.pdf]

**A**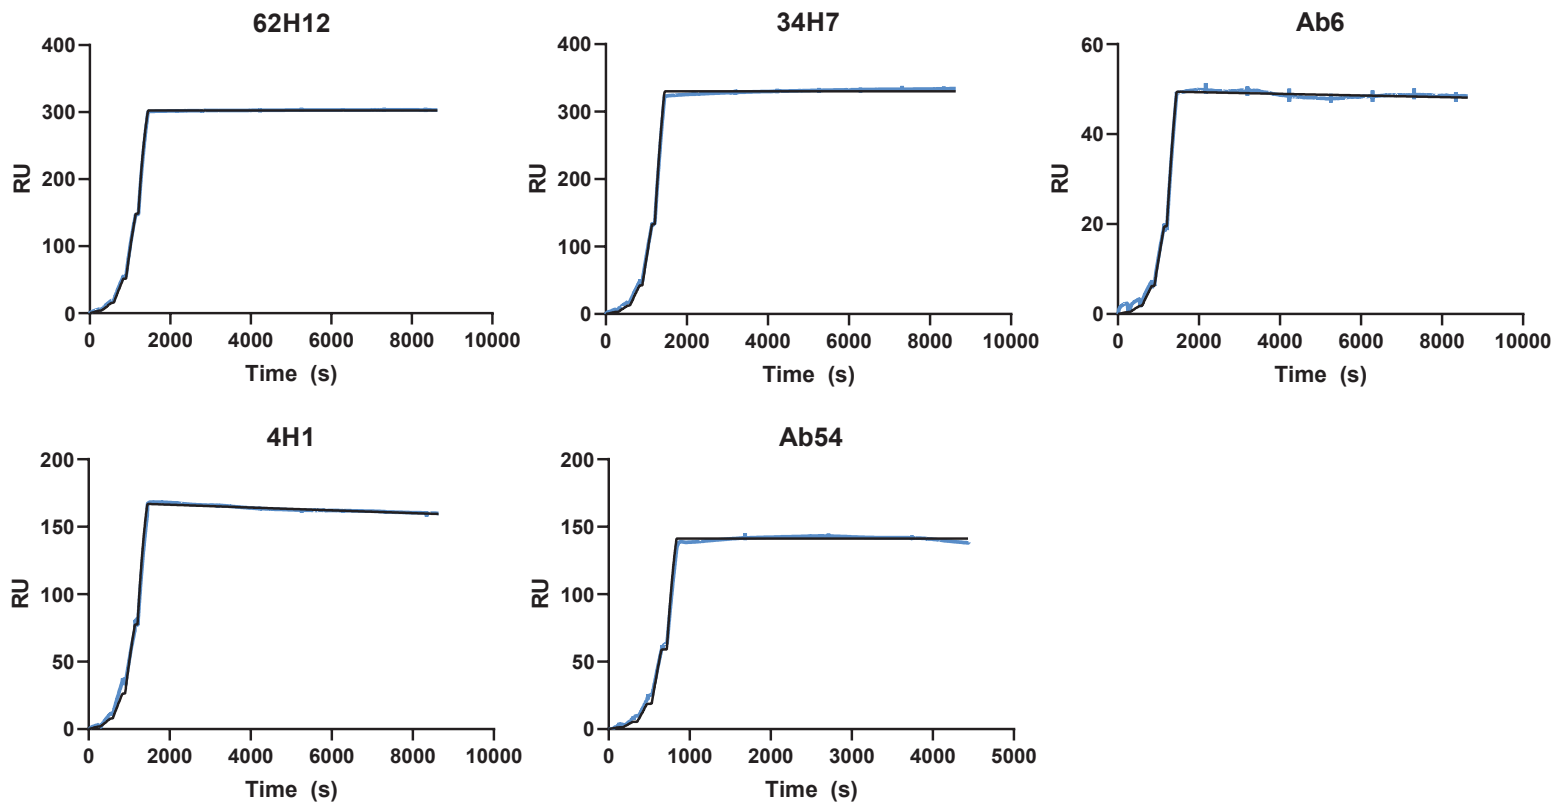**B**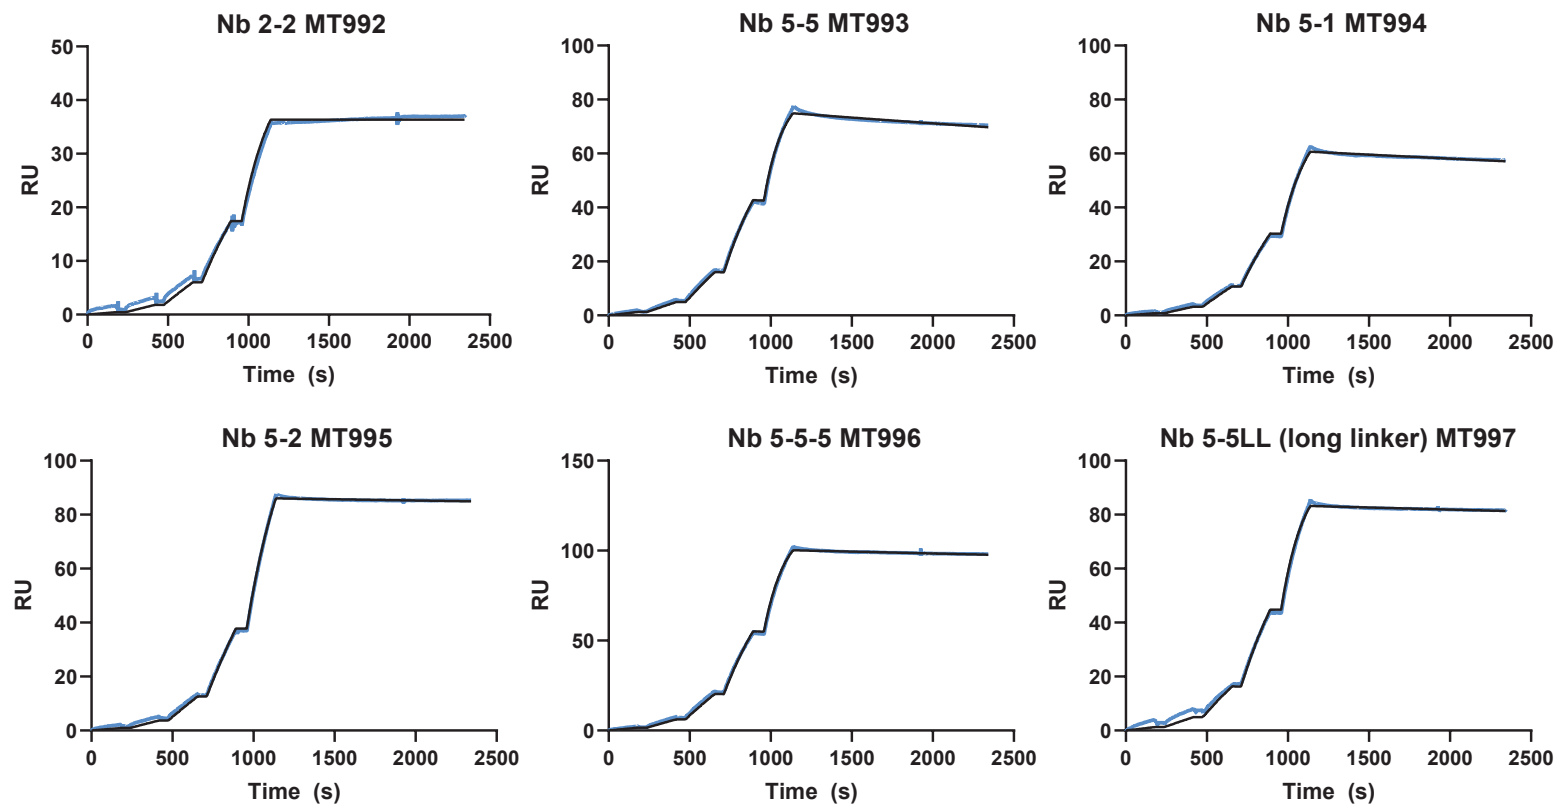

**Supplementary Figure 13. Representative SPR sensorgrams of ORF1 monoclonal antibodies and “2nd Gen.” nanobody multimers.** Single-cycle kinetics performed over immobilized ORF1, with (A) monoclonal antibodies or (B) nanobody multimers injected sequentially at 0.1, 0.3, 1, 3, and 10nM concentrations. Raw data (blue) and a 1:1 binding model fit (black) are plotted.
