# Supplementary material for: Ultrasensitive Detection of Circulating LINE-1 ORF1p as a Specific Multicancer Biomarker
Source: PubMed Central journal article supplement — Cancer Discov. 2023 Sep 12;13(12):2532–47. doi: 10.1158/2159-8290.CD-23-0313 (PMC10773488; doi:10.1158/2159-8290.cd-23-0313), 2023-09-12
Supplement: cd-23-0313_supplementary_figure_14_suppsf14.pdf [file cd-23-0313_supplementary_figure_14_suppsf14.pdf]

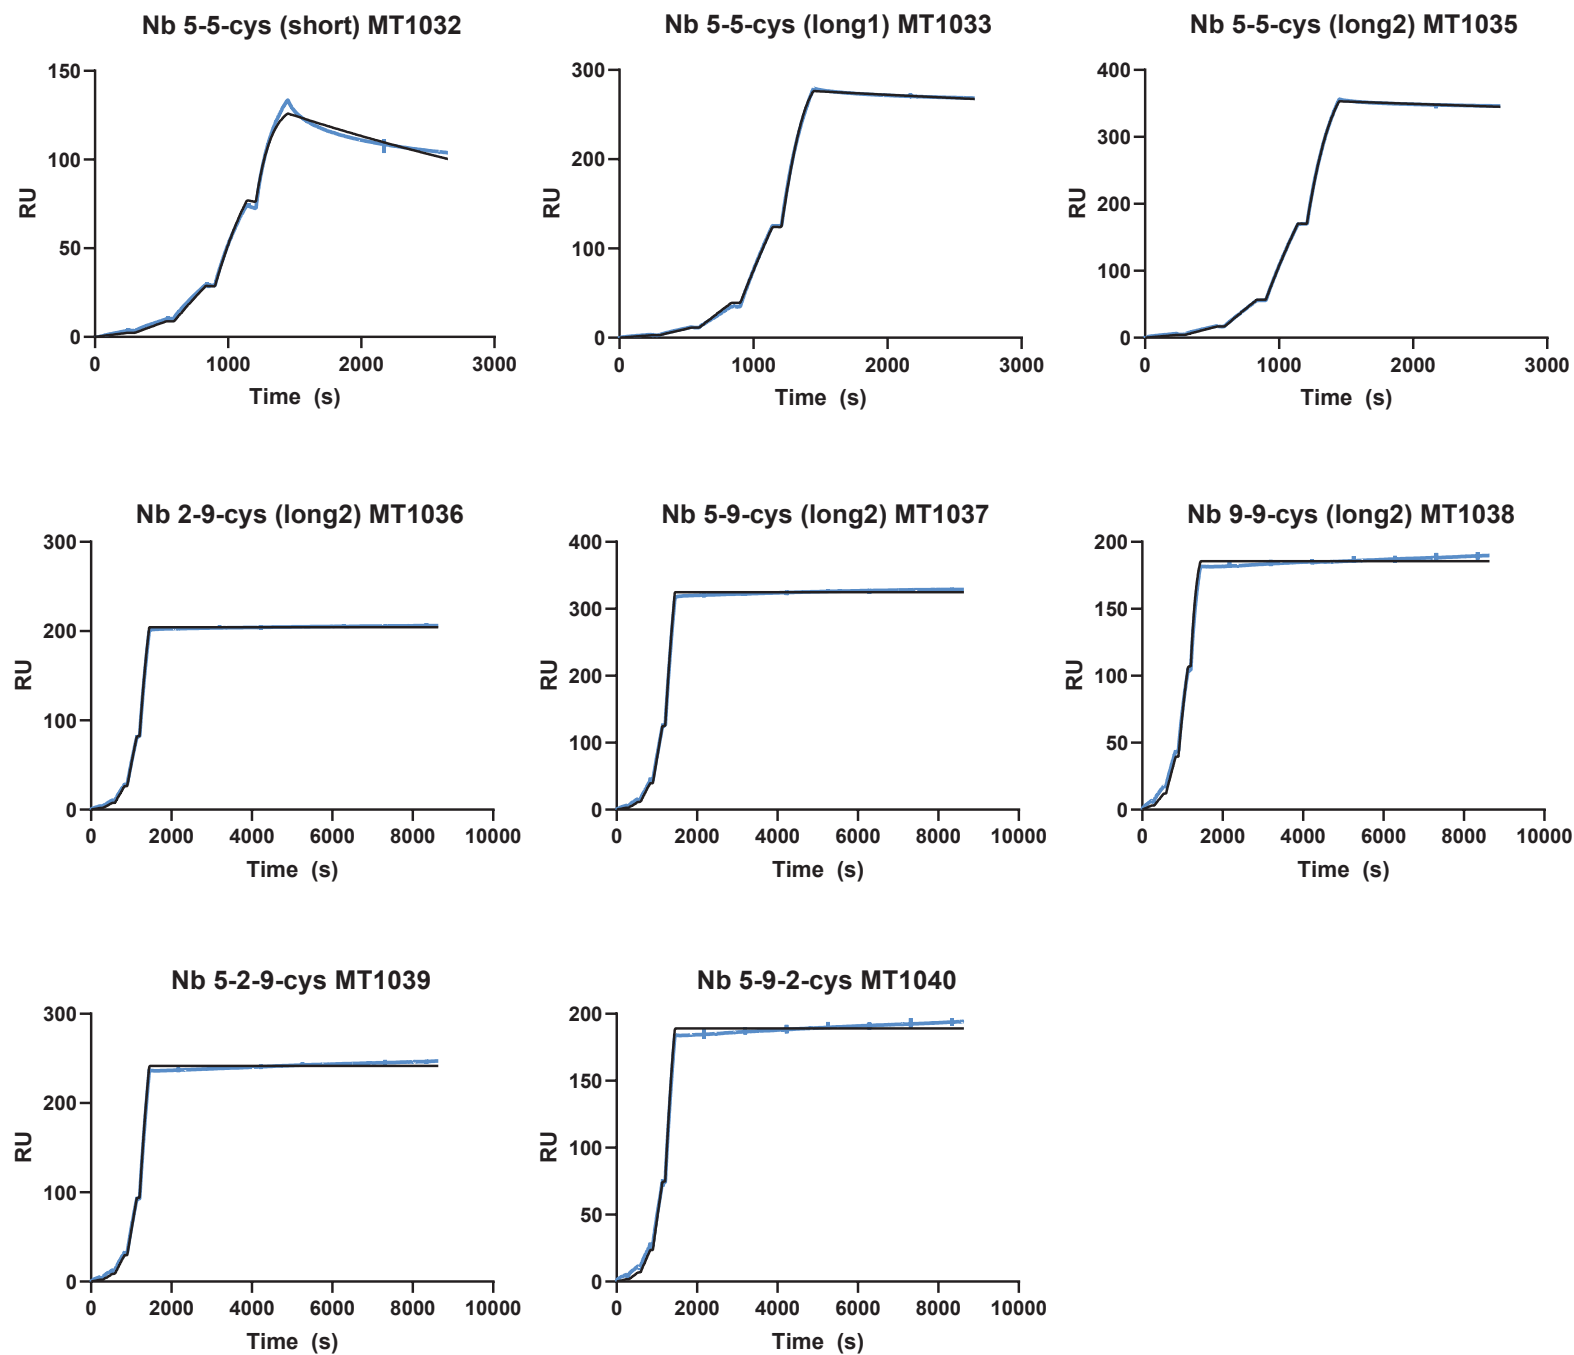

**Supplementary Figure 14. Representative SPR sensorgrams of ORF1 “3rd Gen.” nanobody multimers with “5xCys Tail”.** Single-cycle kinetics performed over immobilized ORF1, with nanobodies injected sequentially at 0.1, 0.3, 1, 3, and 10nM concentrations. Raw data (blue) and a 1:1 binding model fit (black) are plotted.
