# Supplementary material for: Ultrasensitive Detection of Circulating LINE-1 ORF1p as a Specific Multicancer Biomarker
Source: PubMed Central journal article supplement — Cancer Discov. 2023 Sep 12;13(12):2532–47. doi: 10.1158/2159-8290.CD-23-0313 (PMC10773488; doi:10.1158/2159-8290.cd-23-0313), 2023-09-12
Supplement: cd-23-0313_supplementary_figure_15_suppsf15.pdf [file cd-23-0313_supplementary_figure_15_suppsf15.pdf]

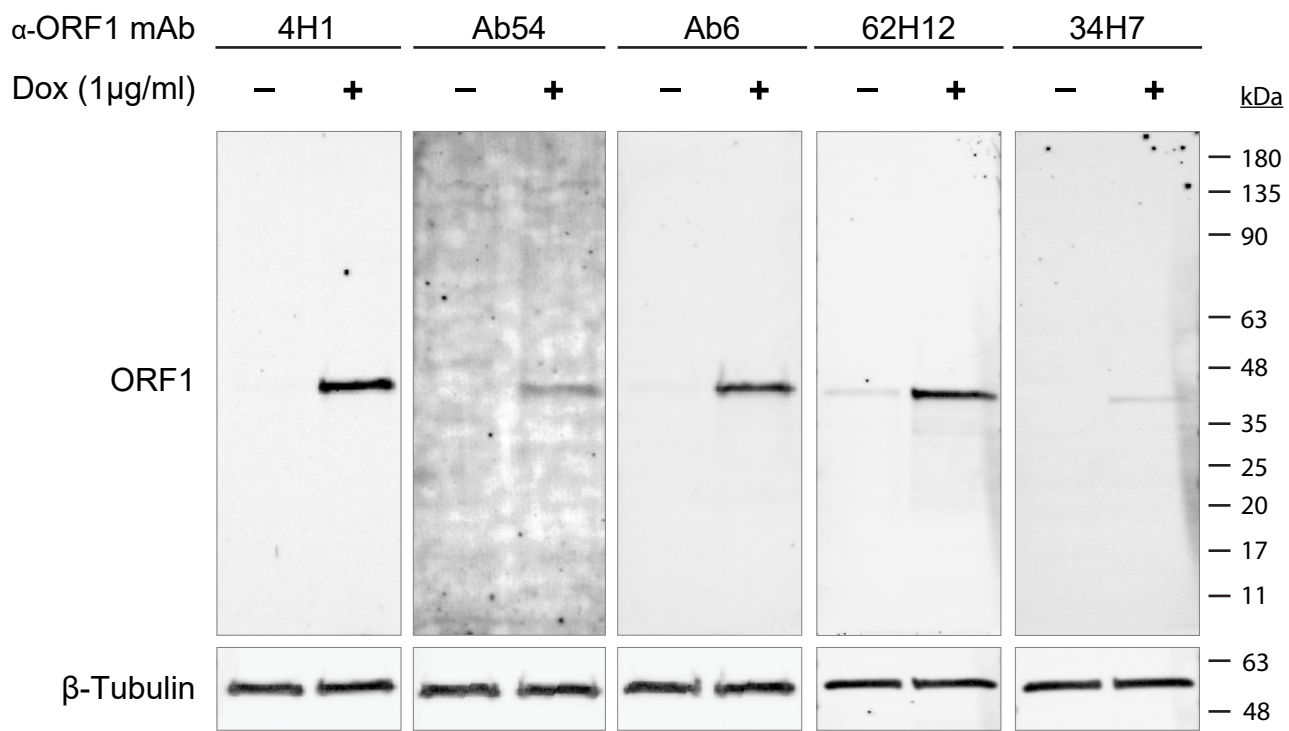

**Supplementary Figure 15. Validation of monoclonal antibodies by western blotting.** HeLa cells with stably integrated tet-On LINE-1 (L1RP)(2) were treated with DMSO as control or with 1 µg/ml doxycycline (Dox) for 4 days to induce L1 expression, lysed with RIPA buffer, cleared, and 20 µg total protein (BCA) was loaded per lane and blotted with the indicated antibodies.
