# Supplementary material for: Ultrasensitive Detection of Circulating LINE-1 ORF1p as a Specific Multicancer Biomarker
Source: PubMed Central journal article supplement — Cancer Discov. 2023 Sep 12;13(12):2532–47. doi: 10.1158/2159-8290.CD-23-0313 (PMC10773488; doi:10.1158/2159-8290.cd-23-0313), 2023-09-12
Supplement: cd-23-0313_supplementary_figure_19_suppsf19.pdf [file cd-23-0313_supplementary_figure_19_suppsf19.pdf]

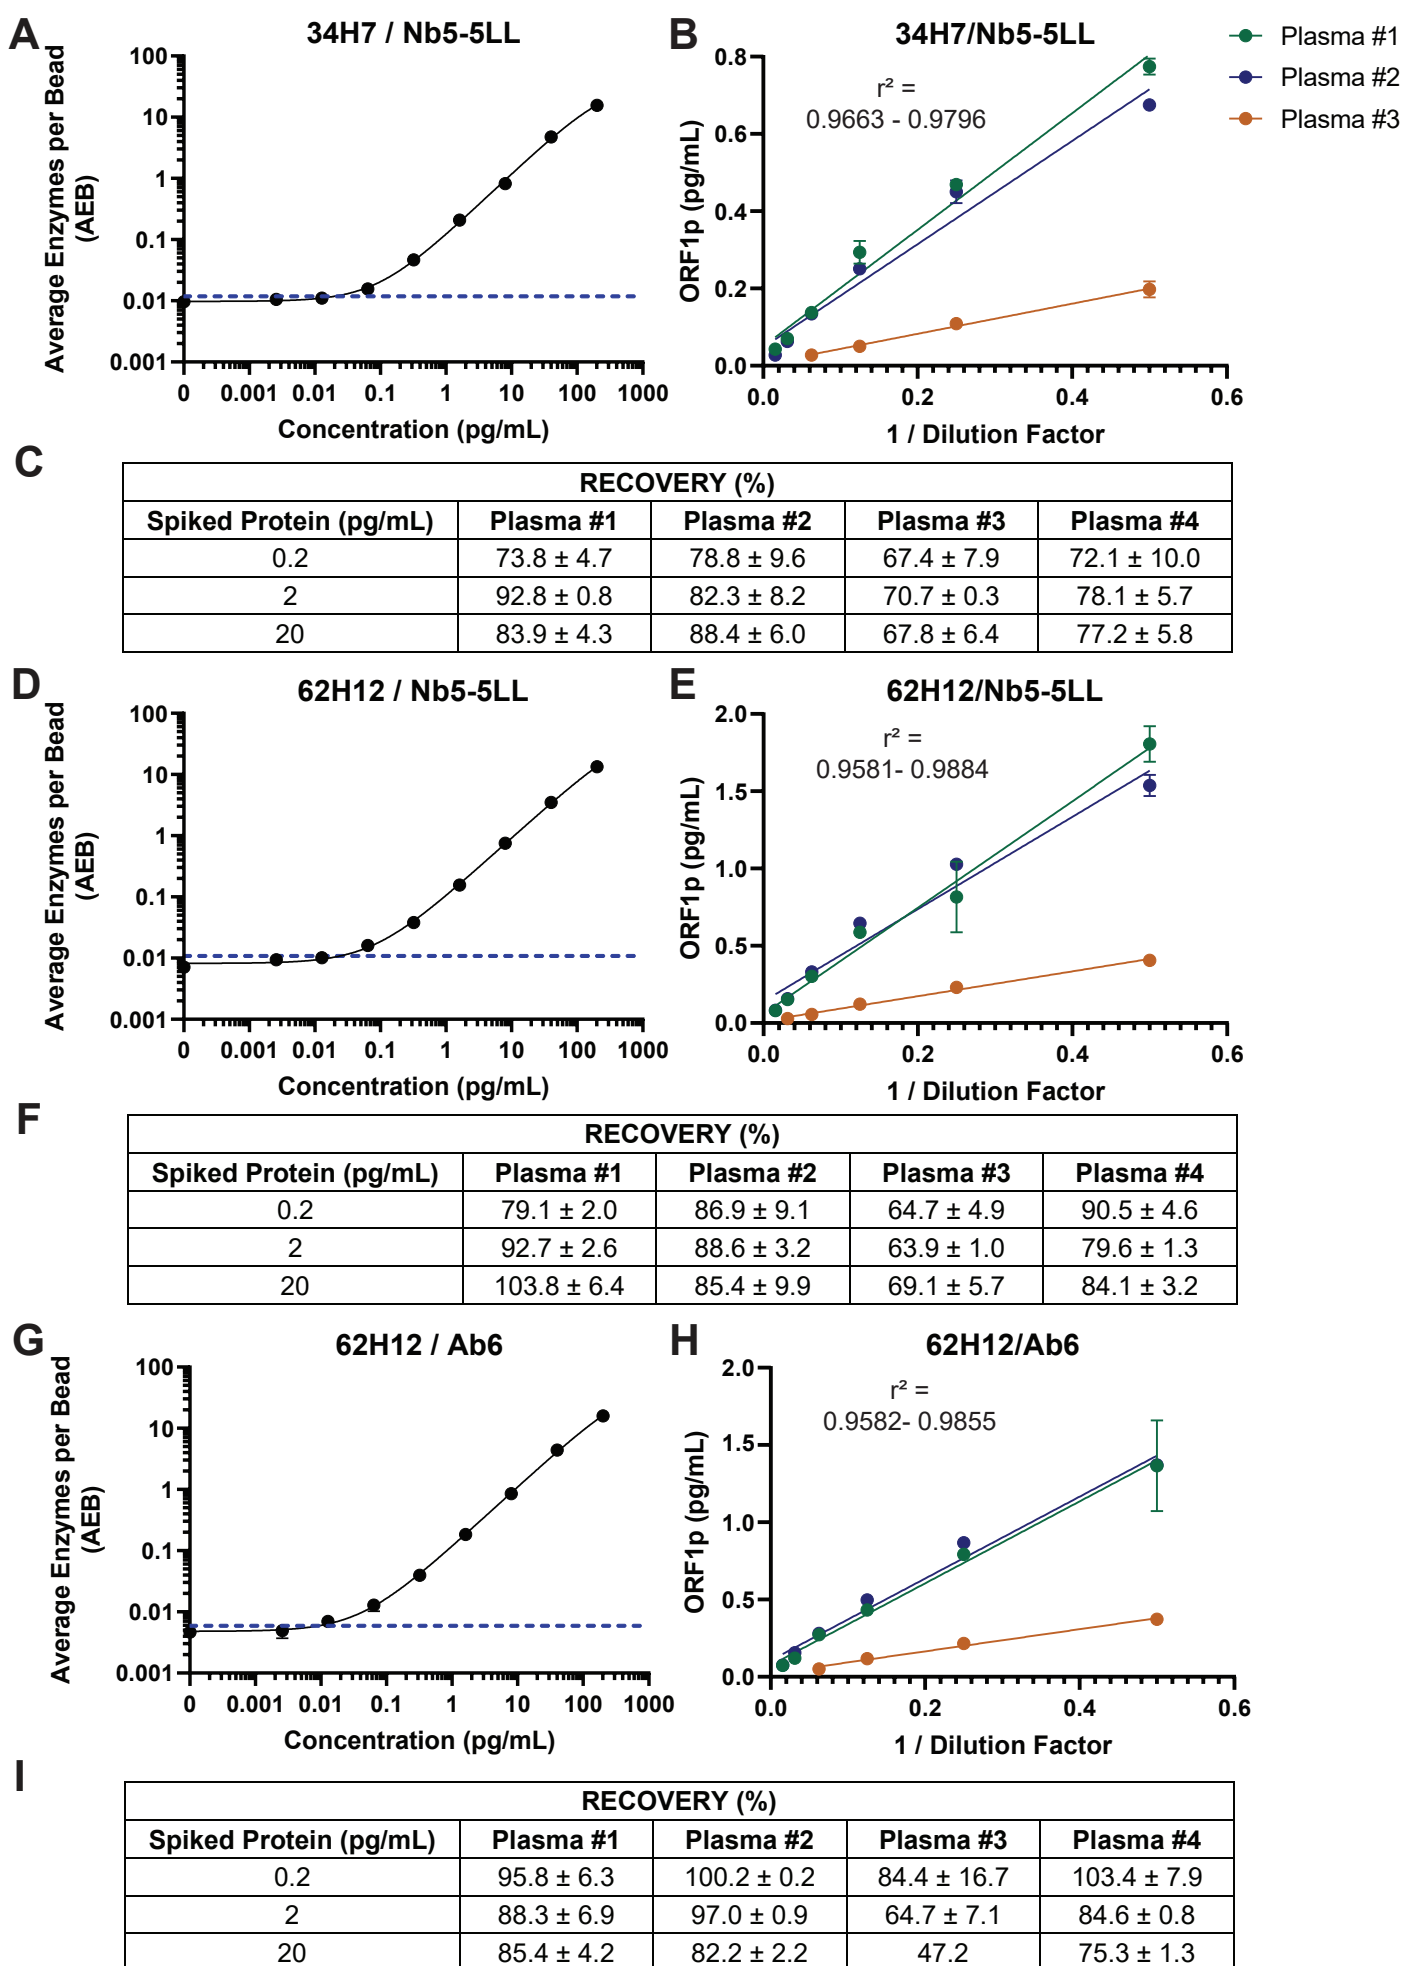

**Supplementary Figure 19. Assay validation for second-generation ORF1p Simoa assays.** (A-C) Representative calibration curve (A), dilution linearity (B), and spike and recovery results (C) for the 34H7/Nb5-5LL (capture/detector) assay. (D-F) Representative calibration curve (D), dilution linearity (E), and spike and recovery results (F) for the 62H12/Nb5-5LL (capture/detector) assay. (G-I) Representative calibration curve (G), dilution linearity (H), and spike and recovery results (I) for the 62H12/Ab6 (capture/detector) assay. Error bars represent the standard deviation of triplicate measurements in each calibration curve and duplicate measurements of all plasma samples.
