# Supplementary material for: Ultrasensitive Detection of Circulating LINE-1 ORF1p as a Specific Multicancer Biomarker
Source: PubMed Central journal article supplement — Cancer Discov. 2023 Sep 12;13(12):2532–47. doi: 10.1158/2159-8290.CD-23-0313 (PMC10773488; doi:10.1158/2159-8290.cd-23-0313), 2023-09-12
Supplement: cd-23-0313_supplementary_figure_20_suppsf20.pdf [file cd-23-0313_supplementary_figure_20_suppsf20.pdf]

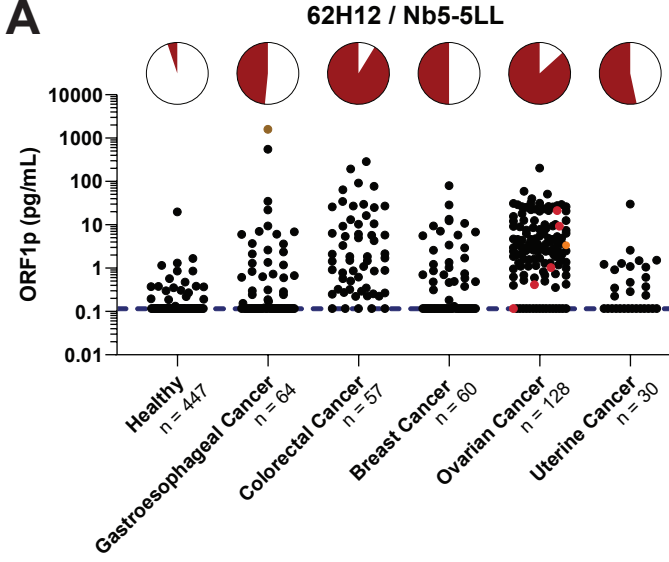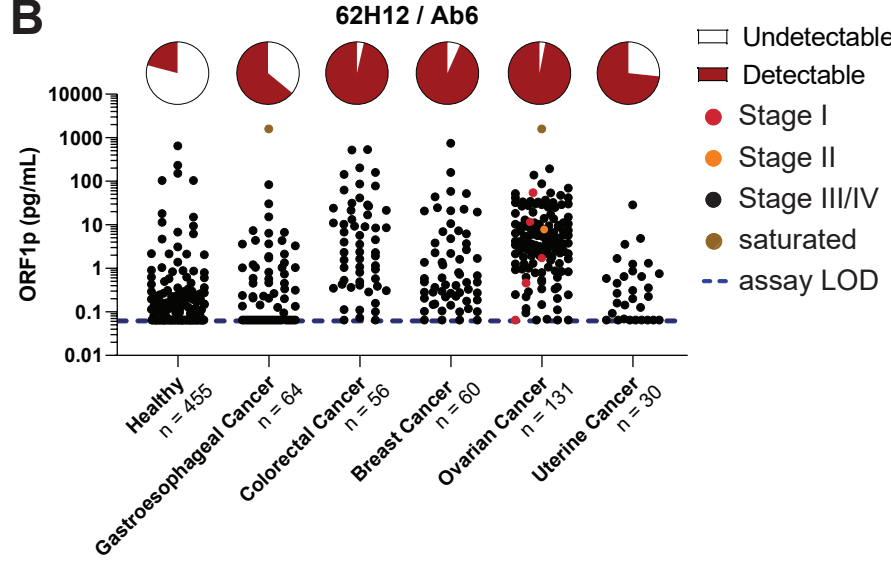

**Supplementary Figure 20. Additional second-generation ORF1p Simoa assay measurements in healthy and cancer patients.** Each assay is denoted by the capture/detector reagent pair: (A) 62H12 capture : Nb5-5LL detect. (B) 62H12 capture : Ab6 detect. For both panels, blue dashed lines indicate assay limits of detection, accounting for four-fold dilution. The proportion of detectable patients within each cancer type is depicted by corresponding pie charts and early-stage patients (stage I/II) are indicated as red and orange dots, respectively.
