# Supplementary material for: Ultrasensitive Detection of Circulating LINE-1 ORF1p as a Specific Multicancer Biomarker
Source: PubMed Central journal article supplement — Cancer Discov. 2023 Sep 12;13(12):2532–47. doi: 10.1158/2159-8290.CD-23-0313 (PMC10773488; doi:10.1158/2159-8290.cd-23-0313), 2023-09-12
Supplement: cd-23-0313_supplementary_figure_21_suppsf21.pdf [file cd-23-0313_supplementary_figure_21_suppsf21.pdf]

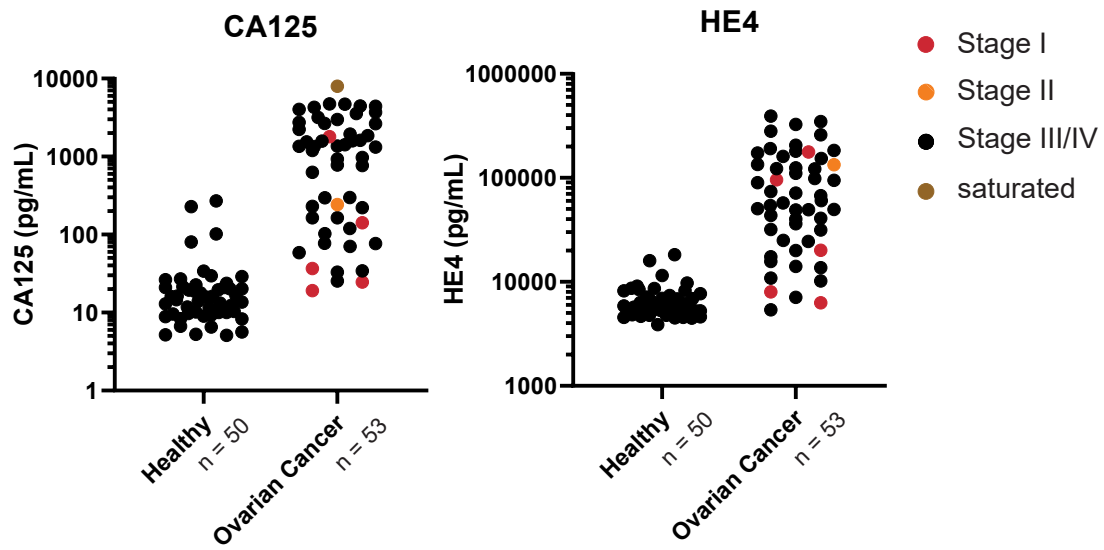

**Supplementary Figure 21. Circulating CA125 and HE4 levels, as measured by Simoa, in ovarian cancer patient cohort** (obtained from Drapkin Lab at the University of Pennsylvania). Early-stage patients (stage I/II) are indicated as red and orange dots, respectively.
