# Supplementary material for: Ultrasensitive Detection of Circulating LINE-1 ORF1p as a Specific Multicancer Biomarker
Source: PubMed Central journal article supplement — Cancer Discov. 2023 Sep 12;13(12):2532–47. doi: 10.1158/2159-8290.CD-23-0313 (PMC10773488; doi:10.1158/2159-8290.cd-23-0313), 2023-09-12
Supplement: cd-23-0313_supplementary_figure_22_suppsf22.pdf [file cd-23-0313_supplementary_figure_22_suppsf22.pdf]

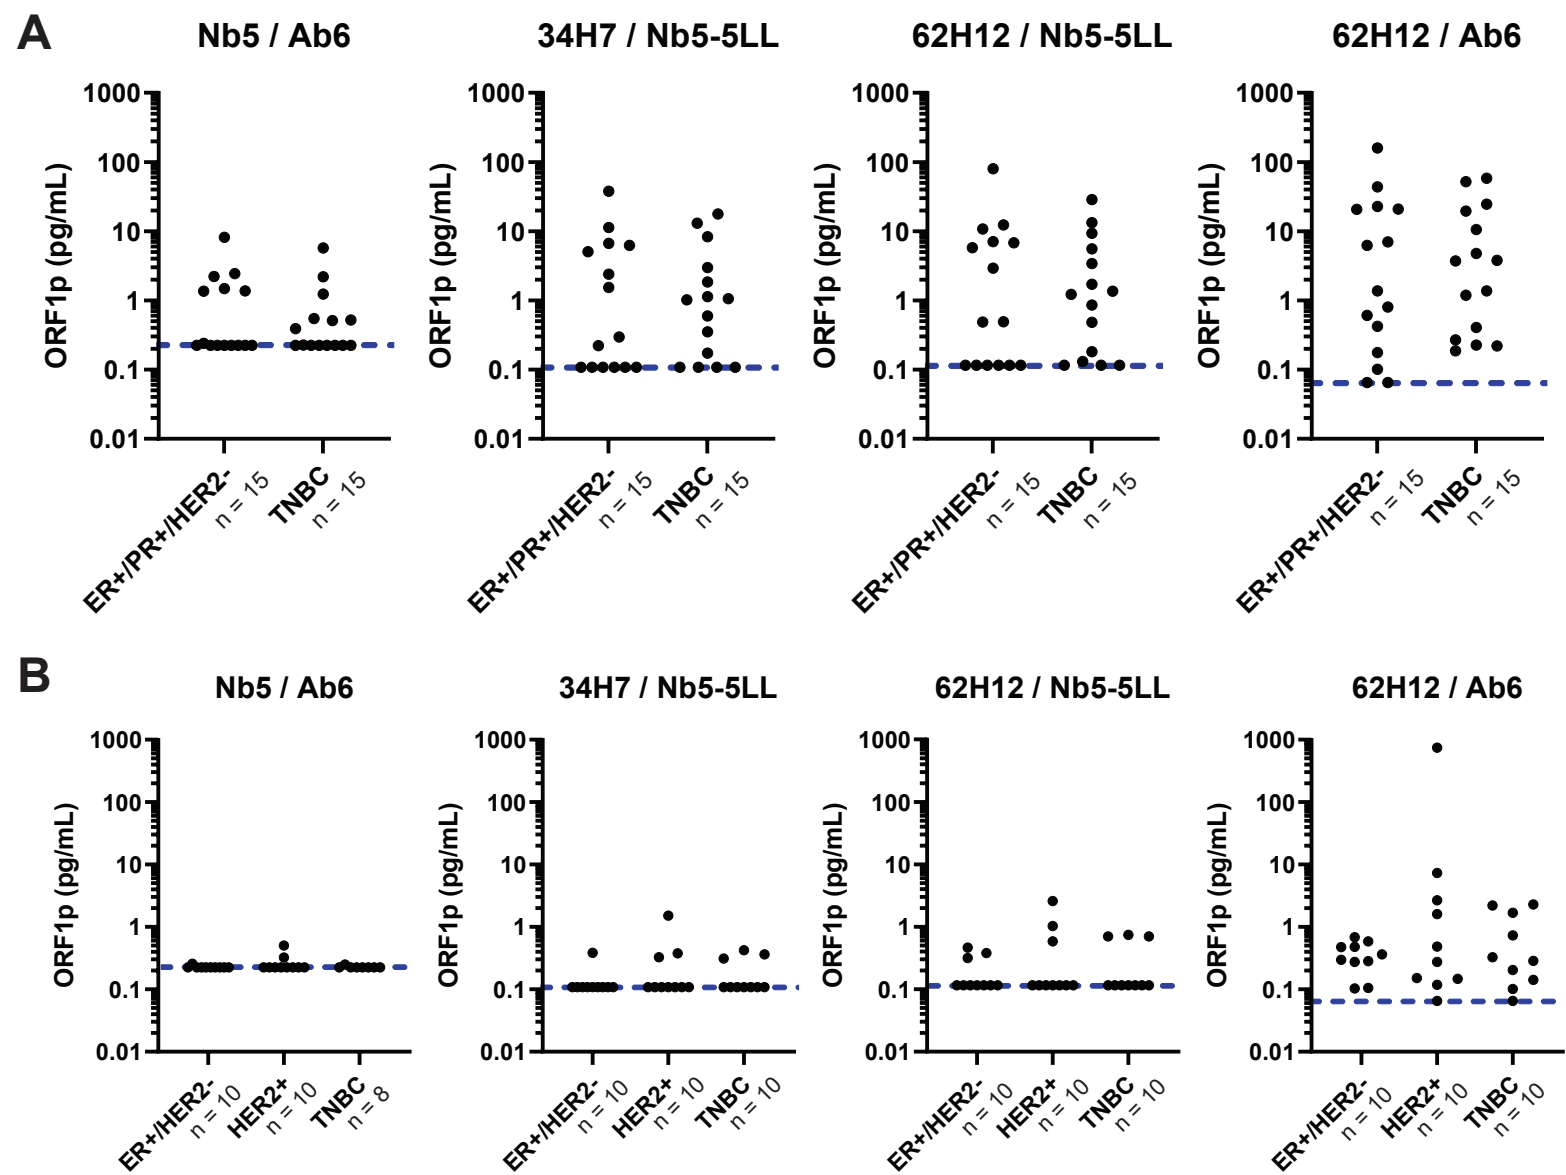

**Supplementary Figure 22. Circulating ORF1p levels in breast cancer patients**, classified by receptor status, with (A) metastatic and (B) localized disease. First- and second-generation Simoa assays were used to measure circulating ORF1p, with each assay labeled as capture/detector reagent. Blue dashed lines indicate assay limits of detection, accounting for four-fold dilution. ER, estrogen receptor; PR, progesterone receptor; HER2, human epidermal growth factor receptor 2; TNBC, triple-negative breast cancer.
