# Supplementary material for: Ultrasensitive Detection of Circulating LINE-1 ORF1p as a Specific Multicancer Biomarker
Source: PubMed Central journal article supplement — Cancer Discov. 2023 Sep 12;13(12):2532–47. doi: 10.1158/2159-8290.CD-23-0313 (PMC10773488; doi:10.1158/2159-8290.cd-23-0313), 2023-09-12
Supplement: cd-23-0313_supplementary_figure_23_suppsf23.pdf [file cd-23-0313_supplementary_figure_23_suppsf23.pdf]

## A Target: LSFISEGEIK

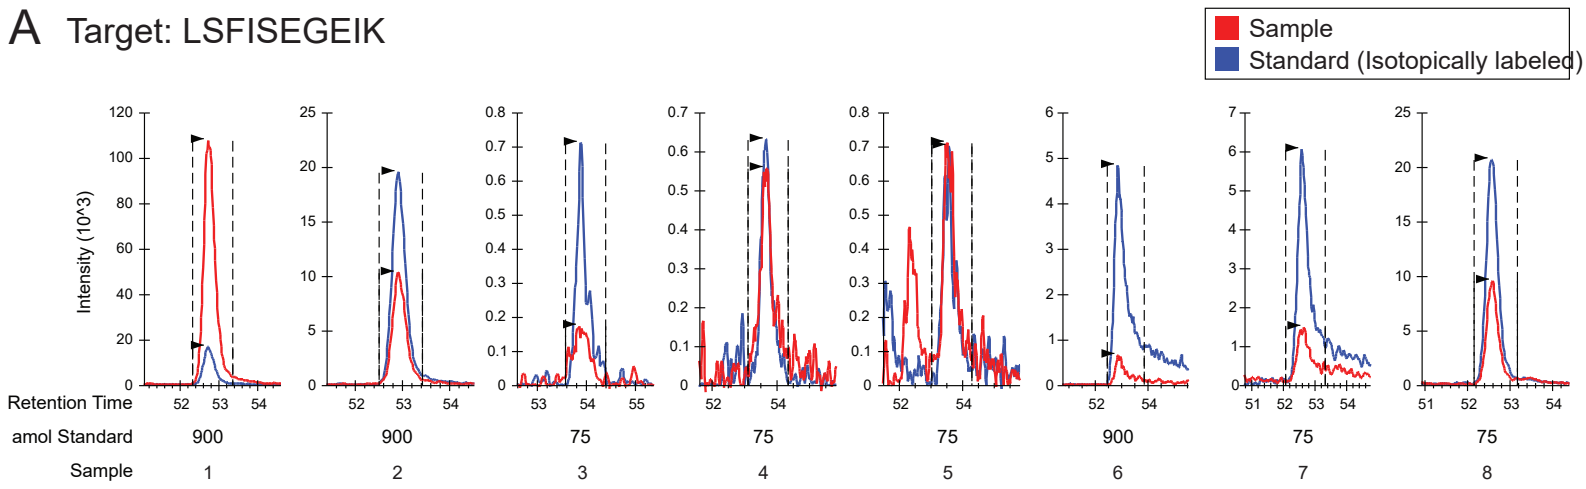

## B Target: NLEECITR

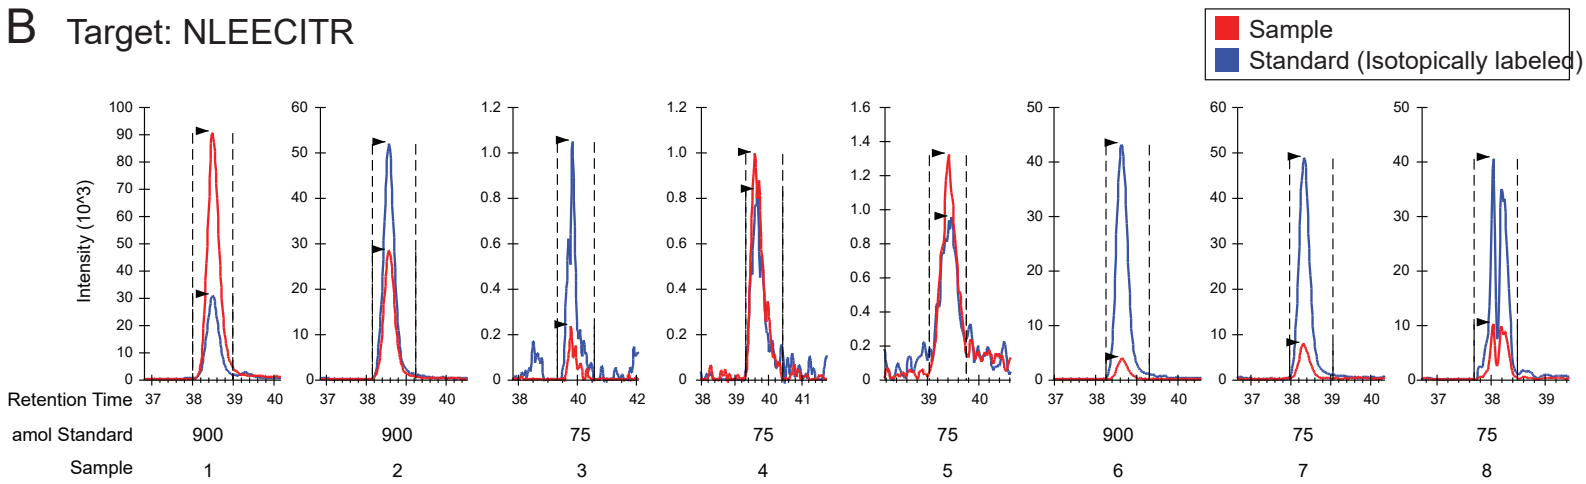

## C

| Sample # | Source | Sample Type | ORF1p Simoa (pg/ml) | Plasma Volume (ml) | Total amol Simoa | Total amol LSFISEGEIK | Total amol NLEECIR |
|----------|--------|-------------|---------------------|--------------------|------------------|-----------------------|--------------------|
| 1        | MGH    | GE Cancer   | 1231                | 3.5                | 107444           | 84023                 | 36415              |
| 2        | MGH    | GE Cancer   | 284                 | 3                  | 21262            | 6345                  | 6938               |
| 3        | BioIVT | Healthy     | 0.06                | 6                  | 9                | 413                   | 210                |
| 4        | BioIVT | Pool (2)    | 0.24                | 4                  | 24               | 1089                  | 1210               |
| 5        | BioIVT | Pool (2)    | 0.13                | 4                  | 13               | 1105                  | 1472               |
| 6        | MGH    | Healthy     | 3.0                 | 5                  | 374              | 1568                  | 1085               |
| 7        | MGH    | Healthy     | 4.7                 | 5                  | 586              | 3261                  | 2015               |
| 8        | MGH    | Healthy     | 232                 | 5                  | 28928            | 5683                  | 3370               |

## D

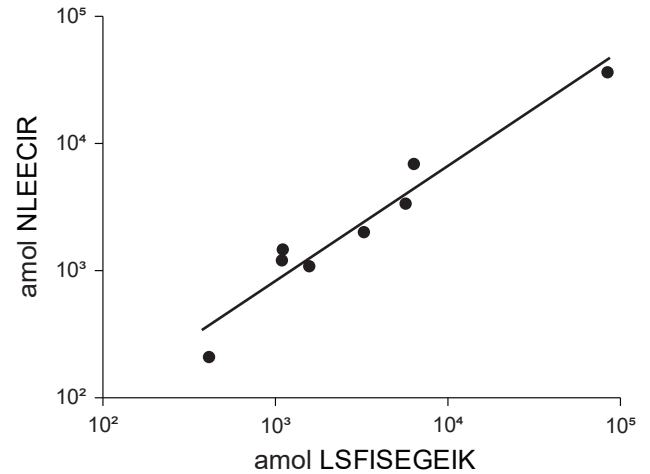

**Supplementary Figure 23. Targeted proteomics analysis of patient plasma.** Samples selected for analysis included two GE cancer patient plasmas with high ORF1p, healthy patients (BioIVT) with very low or undetectable ORF1p, and three healthy patient samples with high ORF1p in the 62H12:Ab6 assay. ORF1p was immunoprecipitated on 62H12-conjugated magnetic beads, digested and prepared for analysis as described above, and assayed for target peptides (A) LSFISEGEIK and (B) NLEECITR, with quantification against spiked-in internal isotopically-labeled standard; results are listed in (C). Traces are from injection of 15% of sample. (C) Assay data: measured and total ORF1p in the samples by Simoa and MS and starting plasma volumes analyzed. Simoa values were from 62H12:Ab6 for samples from MGH (Massachusetts General Hospital) and Nb5:Ab6 for samples from BioIVT; Pool (2): for samples 4 and 5, samples from two healthy patients each were pooled. For healthy samples that were not measurable, the assay LOD was used. (D) Comparison of the two peptides assays. Sample values strongly correlate ( $R^2 = 0.989$ , linear regression, 99.4% correlation (t test),  $p < 0.0001$  for both).
