# Supplementary material for: Ultrasensitive Detection of Circulating LINE-1 ORF1p as a Specific Multicancer Biomarker
Source: PubMed Central journal article supplement — Cancer Discov. 2023 Sep 12;13(12):2532–47. doi: 10.1158/2159-8290.CD-23-0313 (PMC10773488; doi:10.1158/2159-8290.cd-23-0313), 2023-09-12
Supplement: cd-23-0313_supplementary_figure_24_suppsf24.pdf [file cd-23-0313_supplementary_figure_24_suppsf24.pdf]

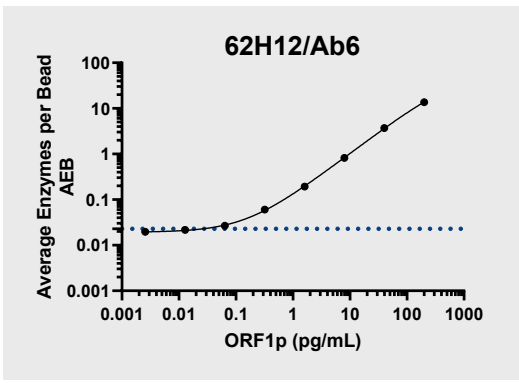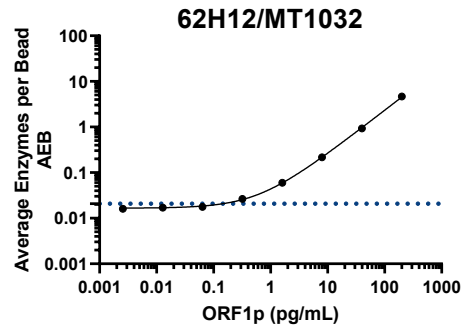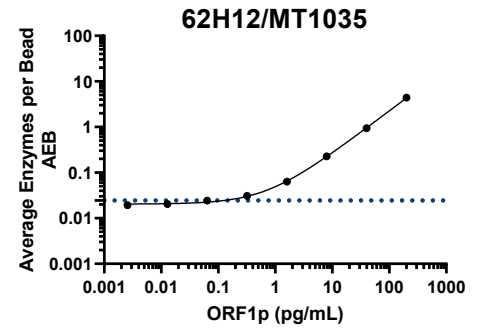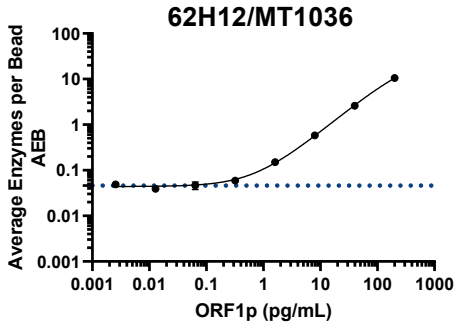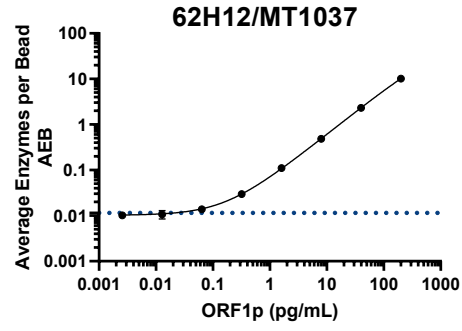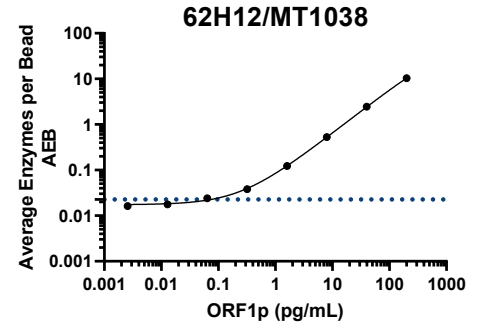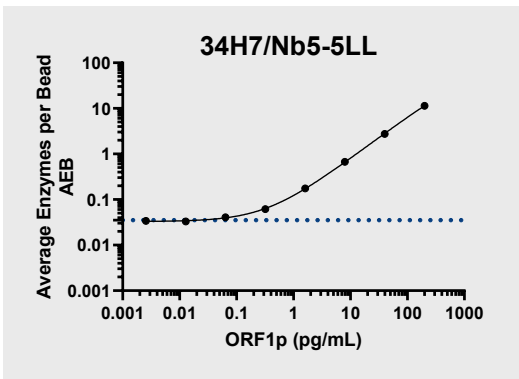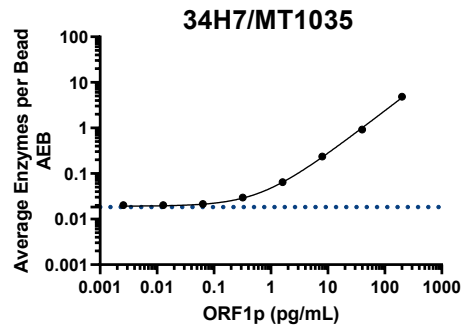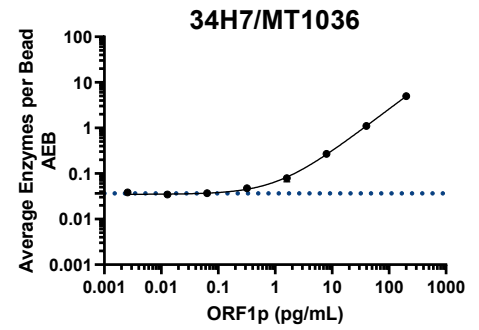

**Supplementary Figure 24. Calibration curves for “3rd Generation” Simoa assays.** Two “2nd Generation” assays are compared, gray boxes. Blue dashed line indicates the assay limit of detection.
