# Supplementary material for: Ultrasensitive Detection of Circulating LINE-1 ORF1p as a Specific Multicancer Biomarker
Source: PubMed Central journal article supplement — Cancer Discov. 2023 Sep 12;13(12):2532–47. doi: 10.1158/2159-8290.CD-23-0313 (PMC10773488; doi:10.1158/2159-8290.cd-23-0313), 2023-09-12
Supplement: cd-23-0313_supplementary_figure_25_suppsf25.pdf [file cd-23-0313_supplementary_figure_25_suppsf25.pdf]

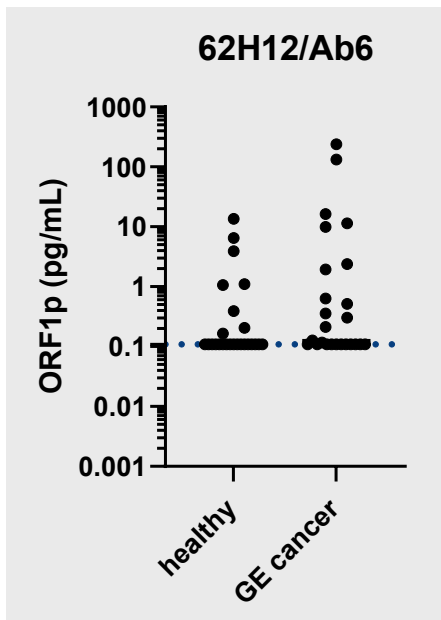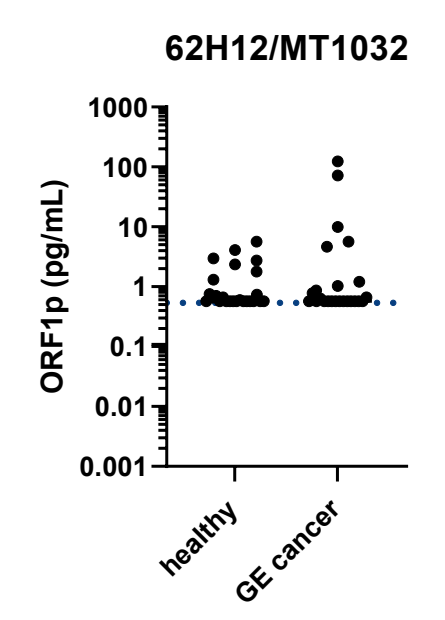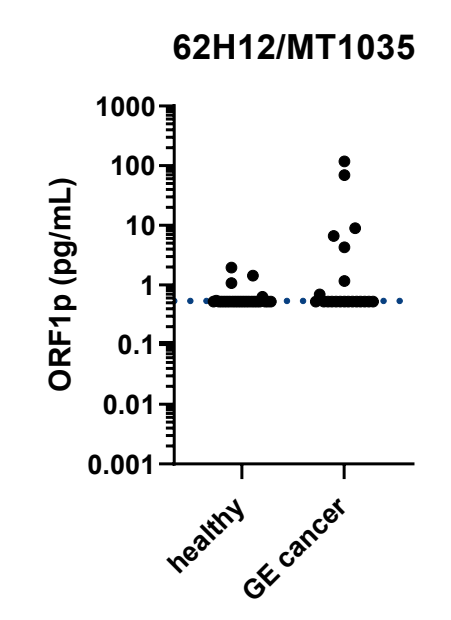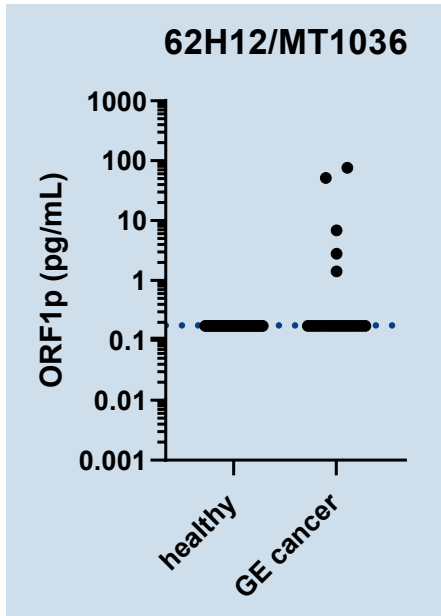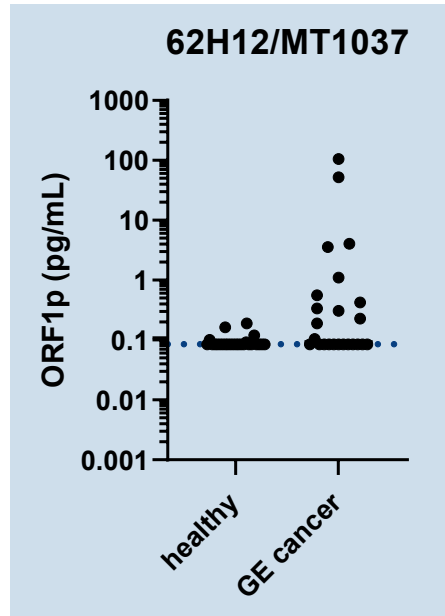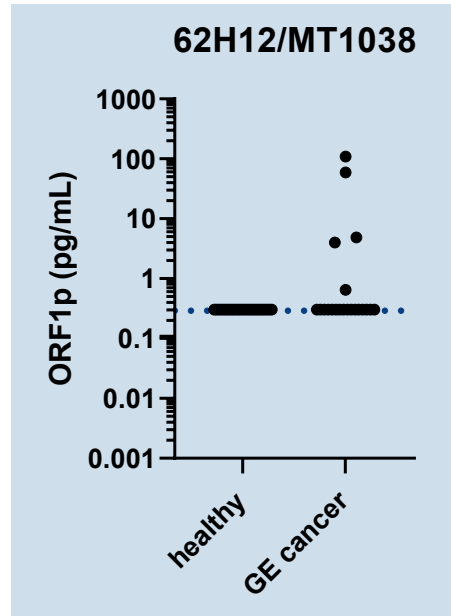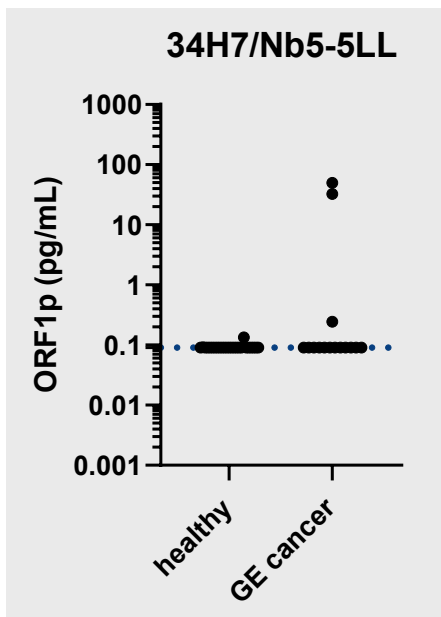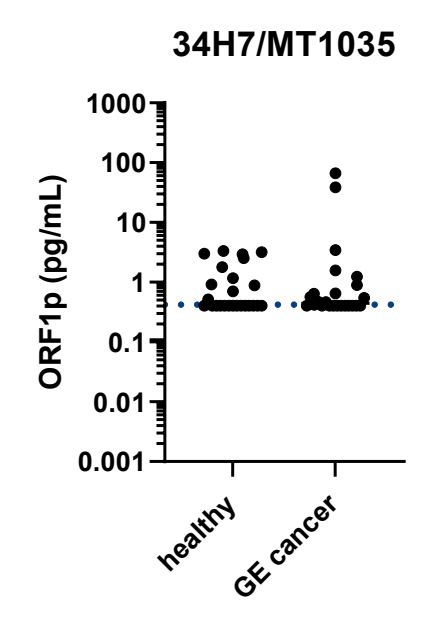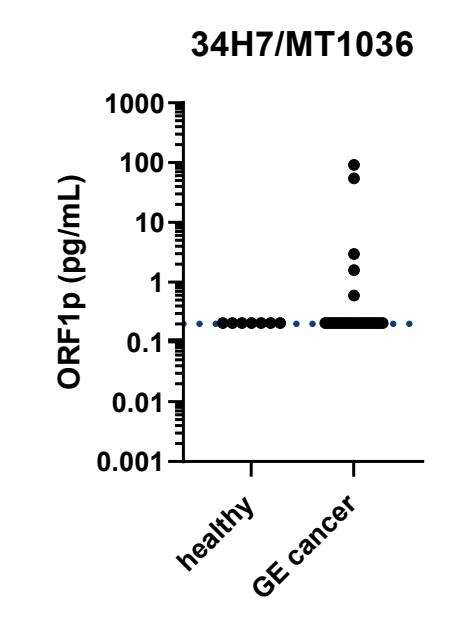

**Supplementary Figure 25. Second round of screening of newly developed “3rd generation” assays using dimeric nanobody detectors.** Affinity reagent pairs selected from a first round of screening in plasma samples (Supplementary Figure 9) were screened in 25 healthy and 25 GE cancer patient plasma samples. Each assay is denoted by the capture/-detector reagent pair. Second-generation assays are run for comparison (gray boxes). Blue dashed lines indicate assay limits of detection, accounting for four-fold dilution. Blue boxes indicate the final three selected third-generation assays. MT1032 and MT1035 are Nb5-5 homodimers with different linkers. MT1036 is a Nb2-Nb9 heterodimer, MT1037 a Nb5-Nb9 heterodimer, and MT1038 a Nb9-Nb9 homodimer.
