# Supplementary material for: Ultrasensitive Detection of Circulating LINE-1 ORF1p as a Specific Multicancer Biomarker
Source: PubMed Central journal article supplement — Cancer Discov. 2023 Sep 12;13(12):2532–47. doi: 10.1158/2159-8290.CD-23-0313 (PMC10773488; doi:10.1158/2159-8290.cd-23-0313), 2023-09-12
Supplement: cd-23-0313_supplementary_figure_27_suppsf27.pdf [file cd-23-0313_supplementary_figure_27_suppsf27.pdf]

High/Low (cohort median ORF1p)

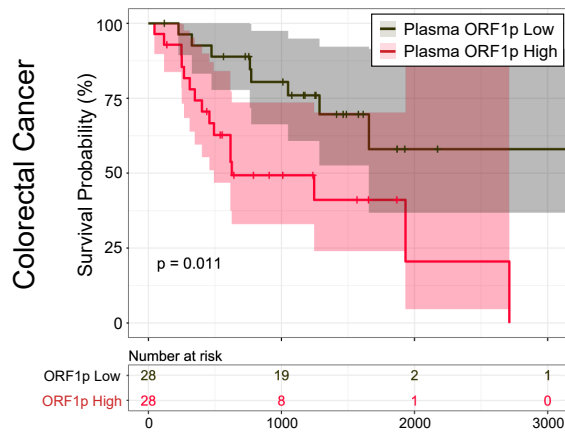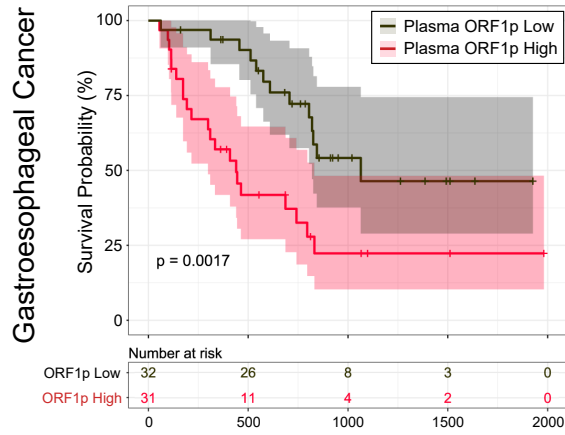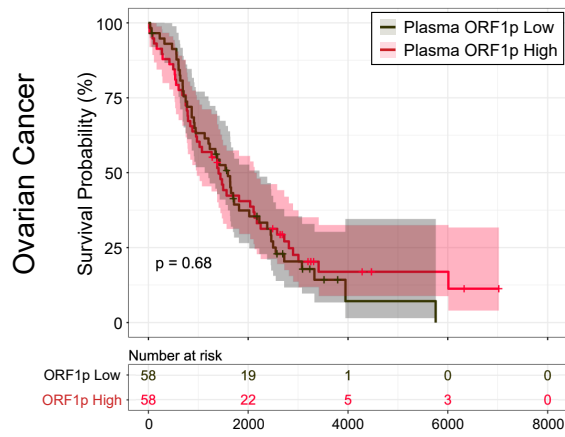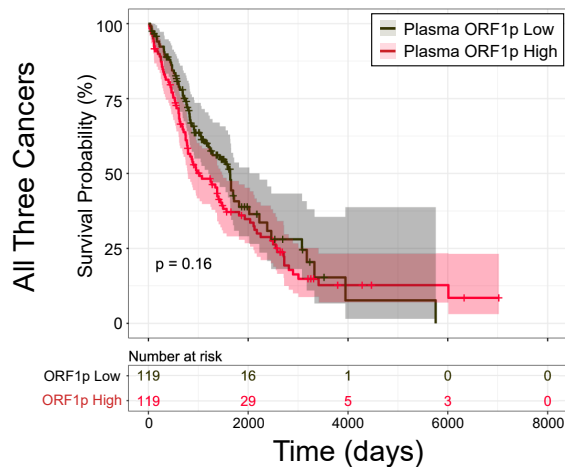

Positive/Negative (majority vote)

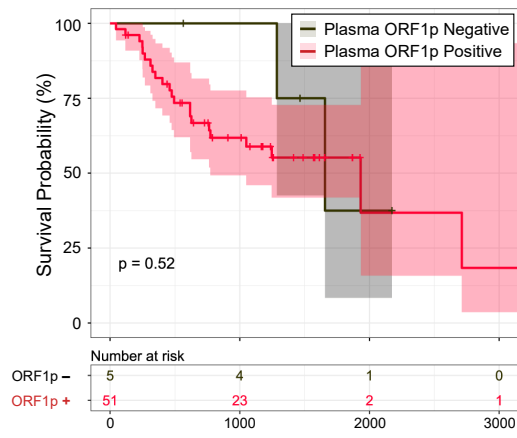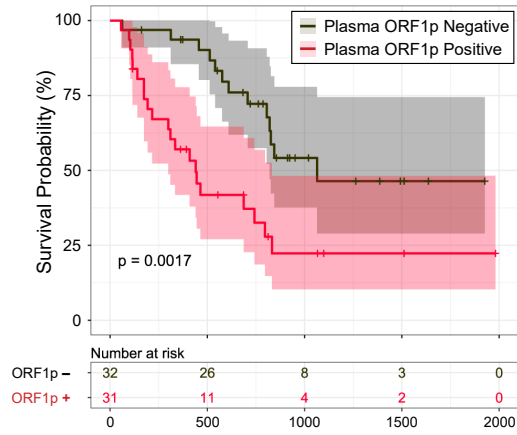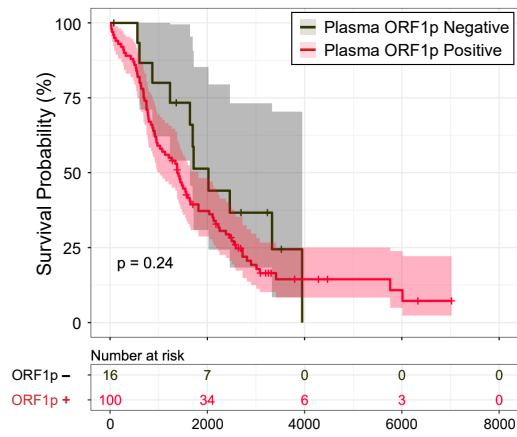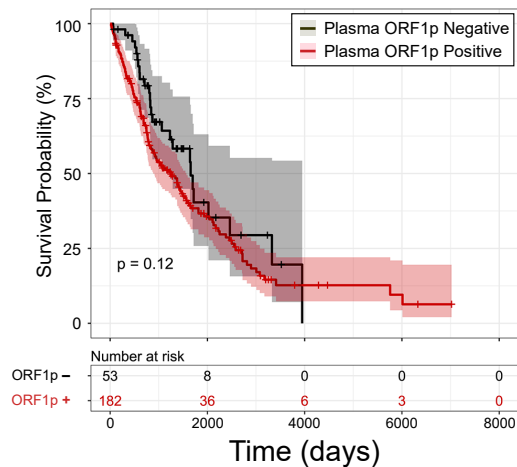

**Supplementary Figure 27. Kaplan-Meier Survival Analysis by ORF1p.** Cohorts are plotted for two different ORF1p classifiers: (left) divided by the cohort median and (right) using a “majority vote” of two of the three 2nd generation assays; note that the two metrics divide GE cancers equally in this cohort. Shaded boxes: 95% confidence intervals; p values: log rank test.
