# Supplementary material for: Ultrasensitive Detection of Circulating LINE-1 ORF1p as a Specific Multicancer Biomarker
Source: PubMed Central journal article supplement — Cancer Discov. 2023 Sep 12;13(12):2532–47. doi: 10.1158/2159-8290.CD-23-0313 (PMC10773488; doi:10.1158/2159-8290.cd-23-0313), 2023-09-12
Supplement: cd-23-0313_supplementary_figure_28_suppsf28.pdf [file cd-23-0313_supplementary_figure_28_suppsf28.pdf]

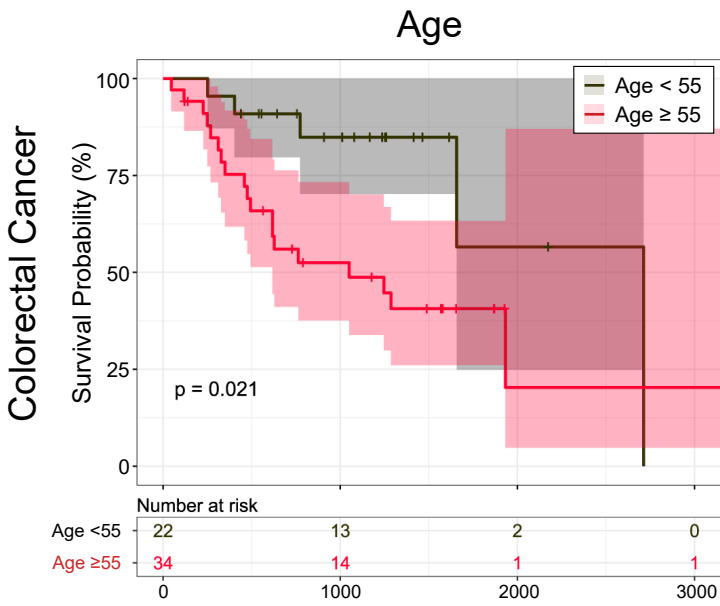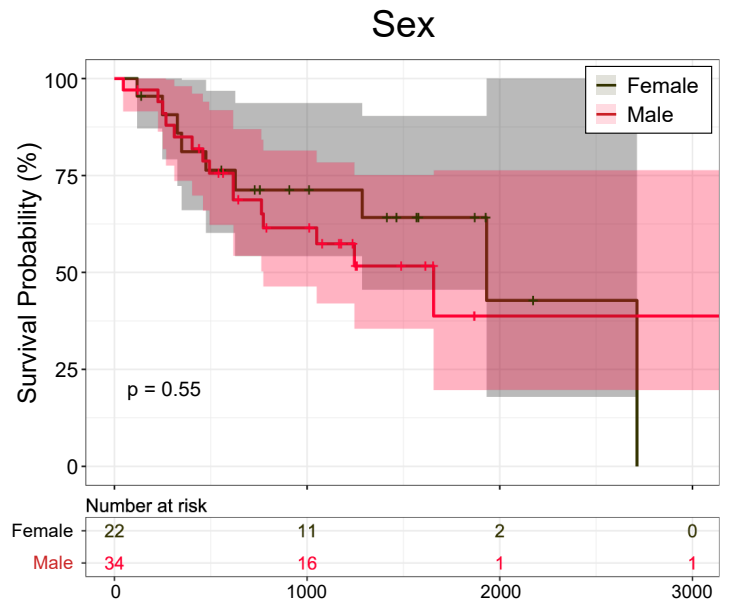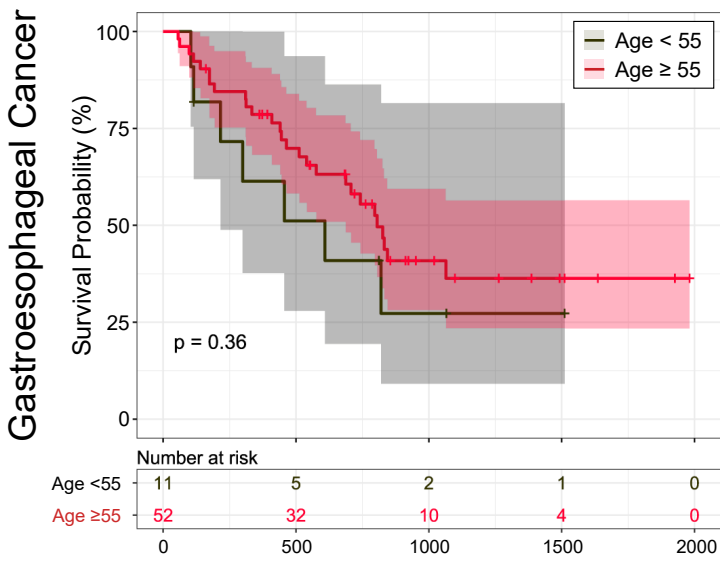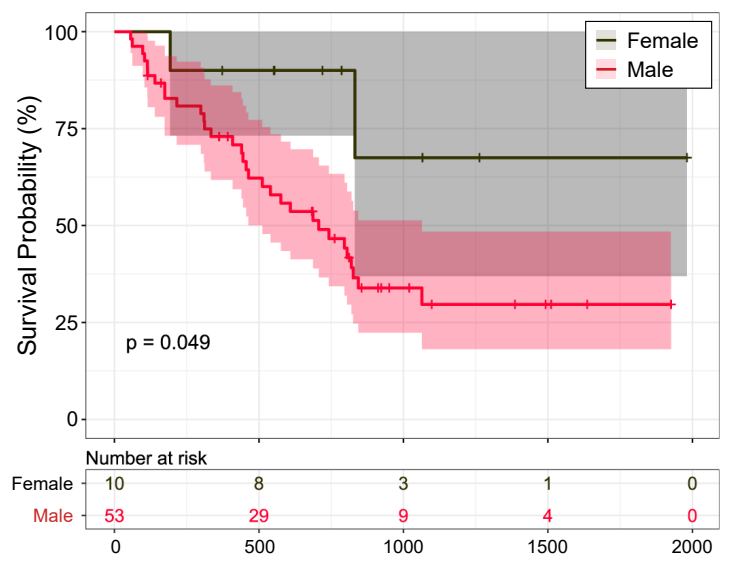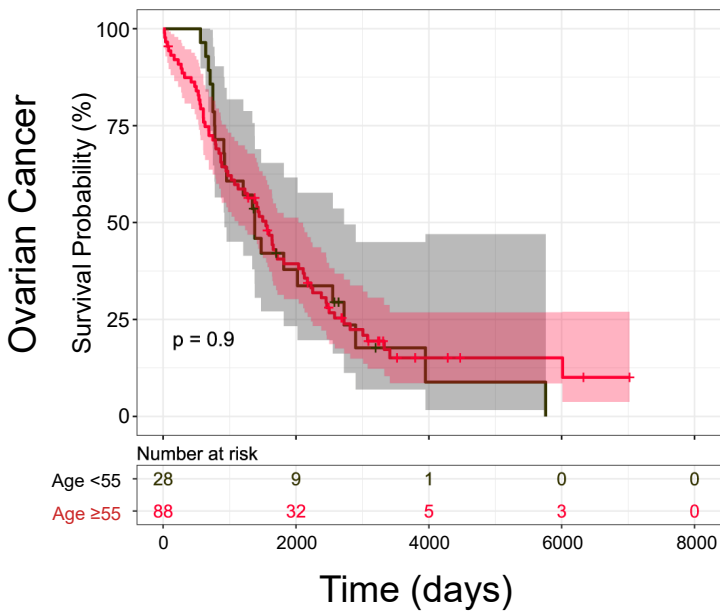

Time (days)

**Supplementary Figure 28. Kaplan-Meier Survival Analysis by Age and Sex.** Shaded boxes: 95% confidence intervals. p values: log rank test.
