# Supplementary material for: Ultrasensitive Detection of Circulating LINE-1 ORF1p as a Specific Multicancer Biomarker
Source: PubMed Central journal article supplement — Cancer Discov. 2023 Sep 12;13(12):2532–47. doi: 10.1158/2159-8290.CD-23-0313 (PMC10773488; doi:10.1158/2159-8290.cd-23-0313), 2023-09-12
Supplement: cd-23-0313_supplementary_figure_29_suppsf29.pdf [file cd-23-0313_supplementary_figure_29_suppsf29.pdf]

## Gastroesophageal Cancer

Global Schoenfeld Test p: 0.2144

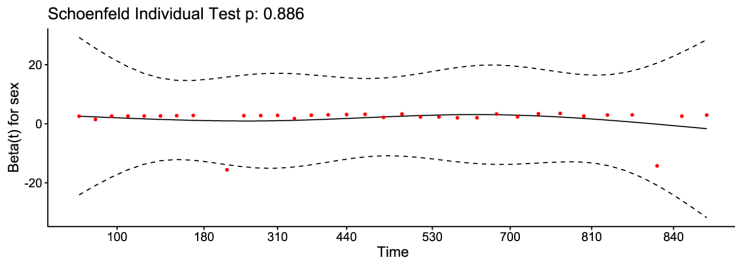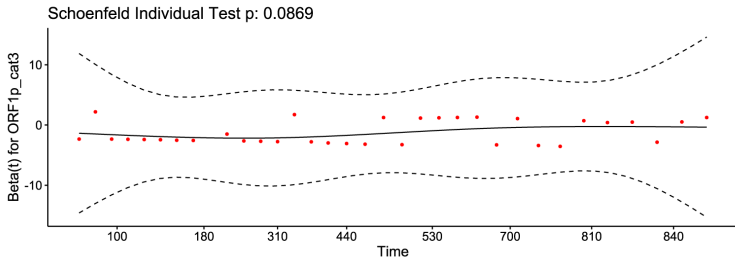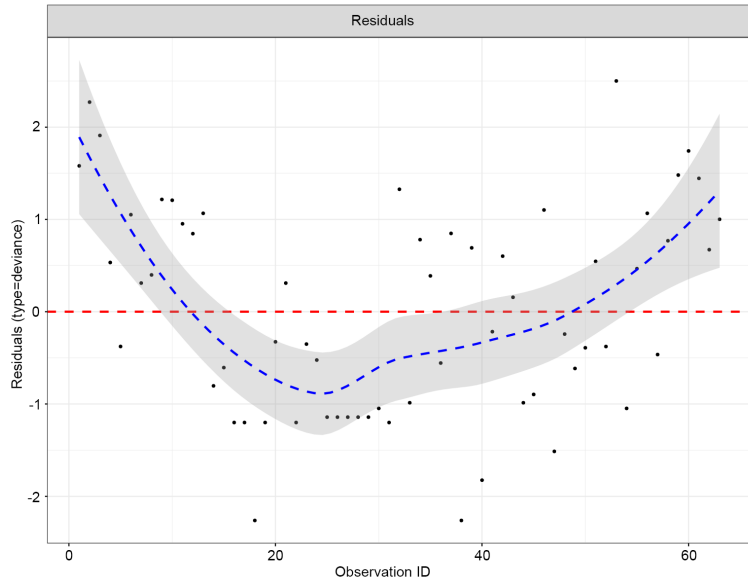

## Colorectal Cancer

Global Schoenfeld Test p: 0.3976

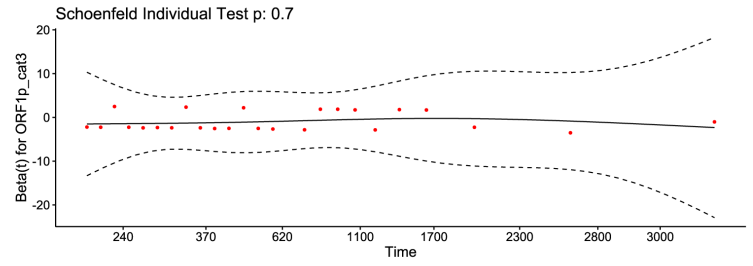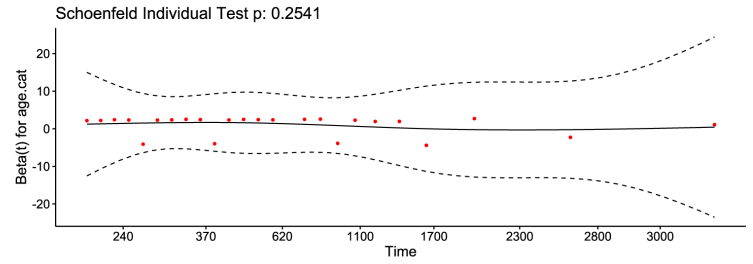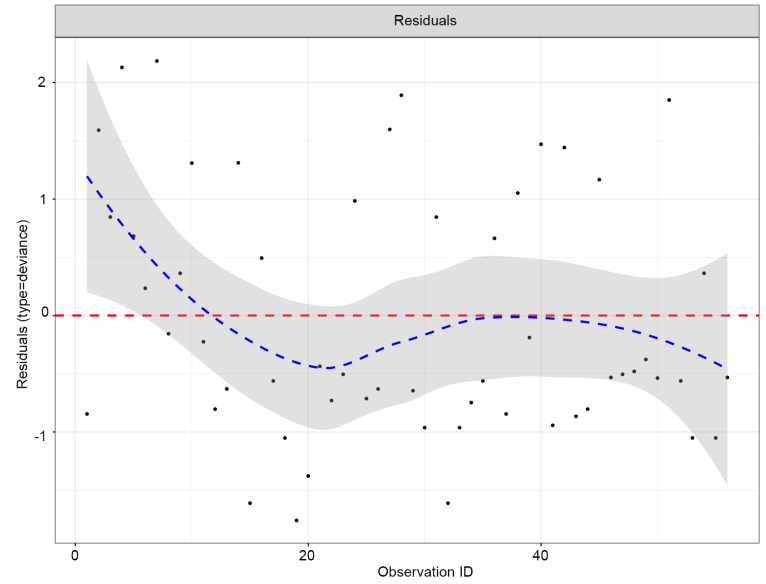

**Supplementary Figure 29. Schoenfeld Tests and Residuals.** The proportional hazard assumptions underlying the Cox models for gastroesophageal and colorectal cancers were tested by plotting the Schoenfeld residuals and applying the Grambsch-Therneau test using the ggcoxdiagnostics function in R. The effect of influential observations was assessed by plotting the Deviance residuals using the ggcoxdiagnostics function in R(3)
